# Supplementary material
Source: PubMed Central journal article supplement (PMC6233829)
Supplement: jamacardiol-3-917-s001.pdf [file jamacardiol-3-917-s001.pdf]

## Supplementary Online Content

Warraich HJ, Xu H, DeVore AD, et al. Trends in hospice discharge and relative outcomes among Medicare patients in the Get With The Guidelines–Heart Failure registry. *JAMA Cardiol*. Published online August 29, 2018. doi:10.1001/jamacardio.2018.2678

**eFigure.** Study population

**eTable 1.** Variable missing rates in overall study population

**eTable 2.** Admission and discharge therapies of heart failure patients discharged to hospice

**eTable 3.** Characteristics of patients discharged to hospice: home vs health care facility

**eTable 4.** Trend of hospice rate in study population (121 990 patients from 438 sites)

**eTable 5.** Characteristics of heart failure patients discharged to hospice over time

**eTable 6.** Survival times in heart failure patients

**eTable 7.** Trends in observed median survival in hospice

**eTable 8.** Characteristics of patients discharged to hospice who survived <7 days, 7 days-1 year, and >1 year

**eTable 9.** Left ventricular assist device implantation or heart transplantation at 1 year after index heart failure discharge

**eTable 10.** Mortality, readmission, and composite outcomes in heart failure patients discharged to hospice by hospice destination

**eTable 11.** Hospital course of patients' first readmission within 1 year post index heart failure discharge

**eTable 12.** Hospital course of patients' first readmission within 1 year post discharge by hospice destination at index heart failure discharge

**eTable 13.** One-year cumulative incidence rate for readmission from hospice by year (4588 patients from 337 sites)

**eTable 14.** Factors associated with 1-year all-cause readmissions in heart failure patients readmitted from hospice

This supplementary material has been provided by the authors to give readers additional information about their work.

**eFigure. Study population**

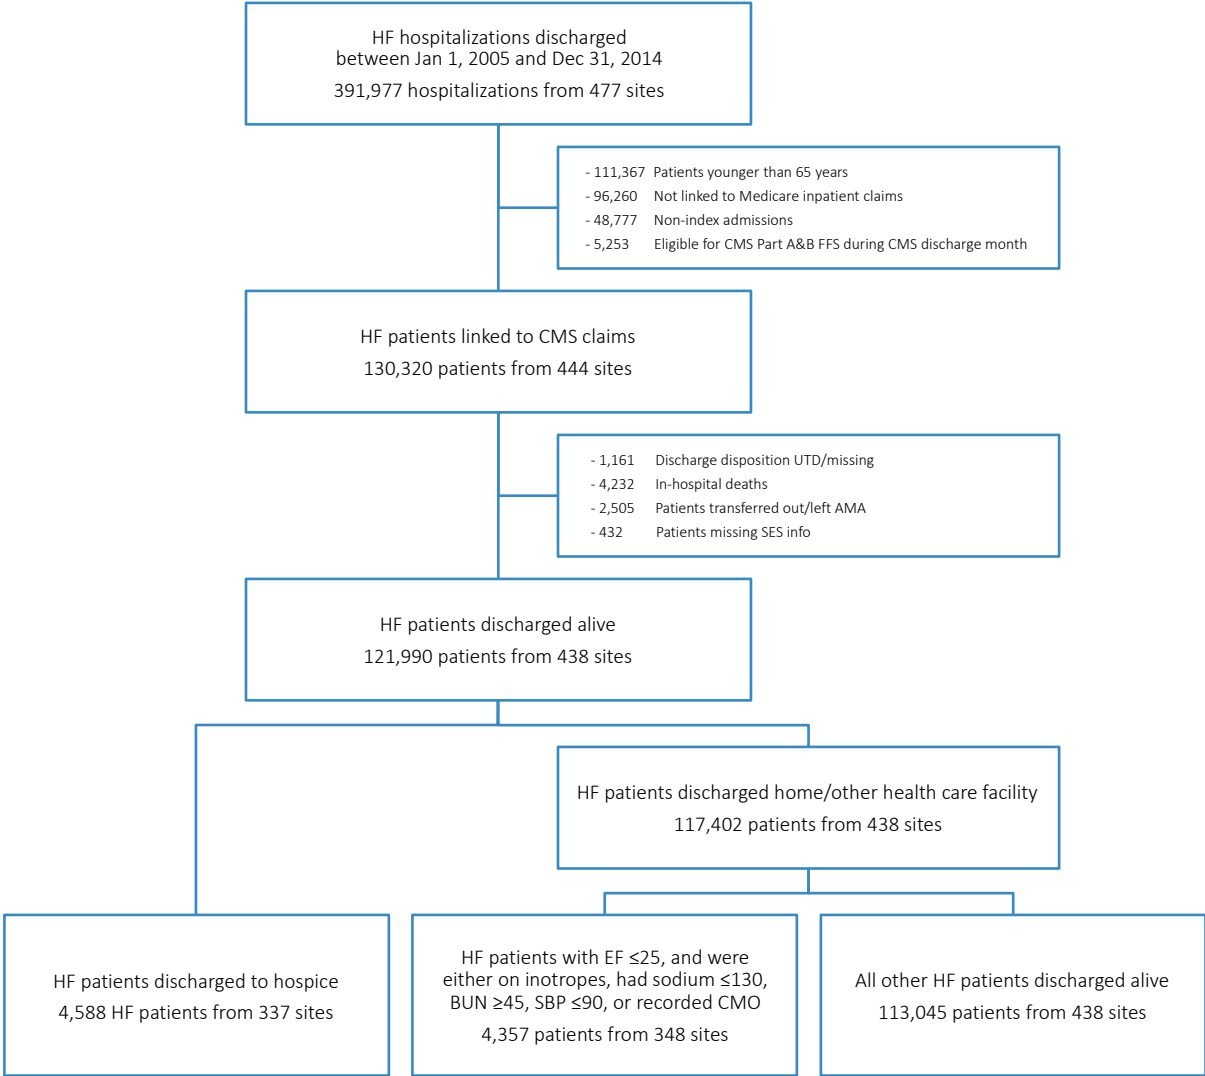

**eTable 1.** Variable missing rates in overall study population

| Variables                                     | Overall<br>N=121,990 | Hospice<br>N=4,588 | Advanced<br>HF<br>N=4,357 | Other HF<br>N=113,045 | Hospice<br>Destination |         |
|-----------------------------------------------|----------------------|--------------------|---------------------------|-----------------------|------------------------|---------|
|                                               |                      |                    |                           |                       | Home                   | HCF     |
|                                               |                      |                    |                           |                       | N=2,424                | N=2,164 |
| Demographics                                  |                      |                    |                           |                       |                        |         |
| Age                                           | 0                    | 0                  | 0                         | 0                     | 0                      | 0       |
| Sex                                           | 0                    | 0                  | 0                         | 0                     | 0                      | 0       |
| Race                                          | 2.05                 | 2.16               | 1.70                      | 2.06                  | 2.43                   | 1.85    |
| Insurance                                     | 17.80                | 21.29              | 8.74                      | 18.01                 | 20.46                  | 22.23   |
| Median household income, in 2015 dollars      | 0                    | 0                  | 0                         | 0                     | 0                      | 0       |
| Median home value, in 2015 dollars            | 0.01                 | 0                  | 0                         | 0.01                  | 0                      | 0       |
| % High school degree                          | 0.01                 | 0                  | 0                         | 0.01                  | 0                      | 0       |
| % College degree                              | 0.01                 | 0                  | 0                         | 0.01                  | 0                      | 0       |
| Unemployment rate                             | 39.09                | 28.31              | 48.75                     | 39.16                 | 30.16                  | 26.25   |
| Year of index discharge                       | 0                    | 0                  | 0                         | 0                     | 0                      | 0       |
| LVEF Source                                   | 4.17                 | 8.48               | 0                         | 4.16                  | 8.46                   | 8.50    |
| EF, %                                         | 9.45                 | 14.84              | 0                         | 9.59                  | 14.44                  | 15.30   |
| EF groups                                     | 4.17                 | 8.48               | 0                         | 4.16                  | 8.46                   | 8.50    |
| Medical History                               | 6.98                 | 6.45               | 2.62                      | 7.17                  | 6.35                   | 6.56    |
| Medical History - Smoking                     | 1.35                 | 7.35               | 0.50                      | 1.14                  | 7.47                   | 7.21    |
| Meds Prior to Admission                       | 37.46                | 44.68              | 15.26                     | 38.03                 | 44.02                  | 45.43   |
| Meds Prior to Admission - Diabetic Meds (Any) | 53.00                | 52.94              | 38.17                     | 53.57                 | 52.93                  | 52.96   |
| Measures on Admission                         |                      |                    |                           |                       |                        |         |
| Heart Rate, bpm                               | 19.26                | 22.17              | 3.88                      | 19.73                 | 21.62                  | 22.78   |
| SBP, mmHg                                     | 19.41                | 22.62              | 4.22                      | 19.87                 | 22.15                  | 23.15   |
| DBP, mmHg                                     | 19.38                | 22.62              | 4.34                      | 19.83                 | 22.15                  | 23.15   |
| BMI                                           | 44.25                | 49.28              | 21.94                     | 44.91                 | 48.18                  | 50.51   |
| Total Cholesterol, mg/dL                      | 79.87                | 86.79              | 71.36                     | 79.92                 | 86.14                  | 87.52   |
| HDL, mg/dL                                    | 80.33                | 86.94              | 71.75                     | 80.39                 | 86.51                  | 87.43   |
| LDL, mg/dL                                    | 80.22                | 87.23              | 72.96                     | 80.22                 | 87.13                  | 87.34   |
| Triglycerides, mg/dL                          | 80.23                | 86.79              | 71.65                     | 80.29                 | 86.43                  | 87.20   |
| Serum sodium, mEq/L                           | 44.86                | 49.41              | 15.47                     | 45.81                 | 49.17                  | 49.68   |
| Hemoglobin, g/dL                              | 48.04                | 52.55              | 19.53                     | 48.95                 | 52.31                  | 52.82   |
| Serum creatinine, mg/dL                       | 29.59                | 32.02              | 9.32                      | 30.27                 | 31.85                  | 32.21   |
| BUN, mg/dL                                    | 44.94                | 49.56              | 15.26                     | 45.90                 | 49.30                  | 49.86   |
| HbA1C, %                                      | 90.78                | 93.11              | 84.09                     | 90.94                 | 92.53                  | 93.76   |
| Symptoms                                      |                      |                    |                           |                       |                        |         |
| Admission Symptoms                            | 49.52                | 54.66              | 23.98                     | 50.30                 | 53.55                  | 55.91   |
| Discharge Symptoms                            | 50.68                | 54.40              | 24.97                     | 51.51                 | 54.21                  | 54.62   |
| Risk Interventions: Symptoms Worsening        | 5.42                 | 19.92              | 3.67                      | 4.90                  | 17.49                  | 22.64   |
| HF Reporting: Symptoms Worsening Instruction  | 31.32                | 100                | 34.75                     | 28.40                 | 100                    | 100     |
| Parental Therapy                              | 28.96                | 32.17              | 8.40                      | 29.62                 | 31.44                  | 32.99   |
| Advanced Care                                 |                      |                    |                           |                       |                        |         |
| Advanced Care Plan/Surrogate Decision Maker   | 60.69                | 52.20              | 70.71                     | 60.65                 | 53.30                  | 50.97   |
| Advance Directive Executed                    | 89.55                | 96.75              | 92.15                     | 89.16                 | 97.19                  | 96.26   |
| HF Reporting: Advanced Care Plan              | 0.03                 | 0.02               | 0                         | 0.03                  | 0.04                   | 0       |
| In- hospital Procedures                       | 32.88                | 37.01              | 11.61                     | 33.54                 | 36.76                  | 37.29   |
| Hospital Characteristics                      |                      |                    |                           |                       |                        |         |
| Number of Beds                                | 3.35                 | 3.49               | 2.73                      | 3.36                  | 2.97                   | 4.07    |
| Rural Location                                | 5.31                 | 2.77               | 5.99                      | 5.39                  | 2.85                   | 2.68    |
| Teaching Status                               | 1.88                 | 2.03               | 1.56                      | 1.88                  | 2.23                   | 1.80    |
| Heart Transplant Hospital                     | 34.06                | 27.83              | 35.92                     | 34.24                 | 27.27                  | 28.47   |

Shaded variables are modelcovariates.

**eTable 2.** Admission and discharge therapies of heart failure patients discharged to hospice

| Variable                                                     | Overall<br>N=121,990 | Hospice<br>N=4,588 | Advanced HF<br>N=4,357 | Other HF<br>N=113,045 | P Value |
|--------------------------------------------------------------|----------------------|--------------------|------------------------|-----------------------|---------|
| <b>Meds Prior to Admission</b>                               |                      |                    |                        |                       |         |
| ACEi/ARB [D]                                                 | 36,169 (47.4)        | 927 (36.5)         | 1,822 (49.3)           | 33,420 (47.7)         | <.0001  |
| Aldosterone antagonist                                       | 6,017 (7.9)          | 244 (9.6)          | 692 (18.7)             | 5,081 (7.3)           | <.0001  |
| Anticoagulation therapy                                      | 21,074 (27.6)        | 621 (24.5)         | 1,222 (33.1)           | 19,231 (27.4)         | <.0001  |
| Aspirin                                                      | 35,726 (46.8)        | 1,175 (46.3)       | 2,012 (54.5)           | 32,539 (46.4)         | <.0001  |
| Beta-Blocker                                                 | 39,842 (52.2)        | 1,360 (53.6)       | 2,122 (57.5)           | 36,360 (51.9)         | <.0001  |
| Diabetic Medications (Any) [D]                               | 16,631 (29.0)        | 461 (21.4)         | 843 (31.3)             | 15,327 (29.2)         | <.0001  |
| Hydralazine                                                  | 4,597 (6.0)          | 140 (5.5)          | 309 (8.4)              | 4,148 (5.9)           | <.0001  |
| Lipid lowering agent (Any)                                   | 42,655 (55.9)        | 1,121 (44.2)       | 2,116 (57.3)           | 39,418 (56.3)         | <.0001  |
| Total of prior medications (max=8)*                          | 3 (2 - 4)            | 2 (1 - 3)          | 3 (2 - 4)              | 3 (1 - 4)             | <.0001  |
| Total of prior medications (max=8)                           |                      |                    |                        |                       | <.0001  |
|                                                              | 8                    | 8 (0.0)            | 0 (0.0)                | 5 (0.0)               |         |
|                                                              | 7                    | 158 (0.2)          | 2 (0.1)                | 136 (0.2)             |         |
|                                                              | 6                    | 1,631 (2.1)        | 33 (1.3)               | 1,452 (2.0)           |         |
|                                                              | 5                    | 6,579 (8.5)        | 140 (5.5)              | 6,015 (8.5)           |         |
|                                                              | 4                    | 13,770 (17.9)      | 396 (15.5)             | 12,529 (17.7)         |         |
|                                                              | 3                    | 18,320 (23.8)      | 600 (23.4)             | 16,797 (23.7)         |         |
|                                                              | 2                    | 17,392 (22.6)      | 608 (23.7)             | 16,108 (22.7)         |         |
|                                                              | 1                    | 14,036 (18.2)      | 537 (21.0)             | 13,022 (18.4)         |         |
|                                                              | 0                    | 5,225 (6.8)        | 247 (9.6)              | 4,778 (6.7)           |         |
| Ace inhibitor                                                | 25,328 (33.2)        | 676 (26.6)         | 1,325 (35.9)           | 23,327 (33.3)         | <.0001  |
| Angiotensin receptor blocker                                 | 11,819 (15.5)        | 260 (10.2)         | 535 (14.5)             | 11,024 (15.7)         | <.0001  |
| Antiarrhythmic                                               | 6,822 (8.9)          | 239 (9.4)          | 587 (15.9)             | 5,996 (8.6)           | <.0001  |
| Antiplatelet agent (excluding aspirin)                       | 12,365 (16.2)        | 369 (14.5)         | 639 (17.3)             | 11,357 (16.2)         | 0.0143  |
| Ca channel blocker                                           | 16,838 (22.1)        | 542 (21.4)         | 317 (8.6)              | 15,979 (22.8)         | <.0001  |
| Digoxin                                                      | 10,794 (14.1)        | 397 (15.6)         | 912 (24.7)             | 9,485 (13.5)          | <.0001  |
| Nitrate                                                      | 12,368 (16.2)        | 427 (16.8)         | 765 (20.7)             | 11,176 (16.0)         | <.0001  |
| Diuretic                                                     | 46,885 (61.5)        | 1,640 (64.6)       | 2,793 (75.7)           | 42,452 (60.6)         | <.0001  |
| Thiazide/Thiazide-like                                       | 5,958 (7.8)          | 187 (7.4)          | 320 (8.7)              | 5,451 (7.8)           | 0.1032  |
| Loop                                                         | 42,565 (55.8)        | 1,542 (60.8)       | 2,647 (71.7)           | 38,376 (54.8)         | <.0001  |
| Statin                                                       | 35,410 (46.4)        | 1,009 (39.8)       | 1,867 (50.6)           | 32,534 (46.4)         | <.0001  |
| Other lipid lowering agent                                   | 4,675 (6.1)          | 89 (3.5)           | 270 (7.3)              | 4,316 (6.2)           | <.0001  |
| Omega-3 fatty acid supplement                                | 2,516 (3.3)          | 58 (2.3)           | 139 (3.8)              | 2,319 (3.3)           | 0.0047  |
| Renin Inhibitor                                              | 210 (0.3)            | 4 (0.2)            | 4 (0.1)                | 202 (0.3)             | 0.0651  |
| Other                                                        | 36,489 (47.8)        | 1,291 (50.9)       | 1,725 (46.7)           | 33,473 (47.8)         | 0.0036  |
| Meds Prior to Admission are Missing? [D]                     | 45,701 (37.5)        | 2,050 (44.7)       | 665 (15.3)             | 42,986 (38.0)         | <.0001  |
| <b>Discharge Meds</b>                                        |                      |                    |                        |                       |         |
| ACEi/ARB [D]                                                 | 67,092 (57.4)        | 518 (21.5)         | 2,380 (54.9)           | 64,194 (58.3)         | <.0001  |
| Aldosterone Antagonist prescribed/contraindicated [D]        | 16,988 (15.2)        | 253 (7.8)          | 1,268 (29.8)           | 15,467 (14.8)         | <.0001  |
| Anticoagulation Therapy prescribed/contraindicated [D]       | 38,449 (33.9)        | 410 (12.7)         | 1,605 (37.6)           | 36,434 (34.4)         | <.0001  |
| ASA prescribed/contraindicated [D]                           | 52,013 (60.4)        | 501 (38.8)         | 2,574 (65.3)           | 48,938 (60.5)         | <.0001  |
| Beta Blocker prescribed/contraindicated [D]                  | 93,179 (78.7)        | 1,159 (46.9)       | 3,633 (83.6)           | 88,387 (79.2)         | <.0001  |
| Diabetic Tx prescribed/contraindicated [D]                   | 21,395 (40.3)        | 389 (21.4)         | 1,086 (42.3)           | 19,920 (40.9)         | <.0001  |
| Hydralazine Nitrate prescribed/contraindicated [D]           | 12,681 (11.9)        | 174 (5.5)          | 650 (16.1)             | 11,857 (11.9)         | <.0001  |
| Lipid Lowering Med(s) prescribed/contraindicated [D]         | 47,971 (57.6)        | 328 (27.1)         | 2,283 (58.7)           | 45,360 (58.1)         | <.0001  |
| Total of discharge medications (max=8)*                      | 3 (2 - 4)            | 0 (0 - 1)          | 4 (3 - 5)              | 3 (2 - 4)             | <.0001  |
| Total of discharge medications (max=8)                       |                      |                    |                        |                       | <.0001  |
|                                                              | 8                    | 28 (0.0)           | 0 (0.0)                | 26 (0.0)              |         |
|                                                              | 7                    | 615 (0.5)          | 0 (0.0)                | 552 (0.5)             |         |
|                                                              | 6                    | 4,298 (3.5)        | 18 (0.4)               | 3,950 (3.5)           |         |
|                                                              | 5                    | 13,341 (10.9)      | 69 (1.5)               | 12,525 (11.1)         |         |
|                                                              | 4                    | 23,926 (19.6)      | 170 (3.7)              | 22,583 (20.0)         |         |
|                                                              | 3                    | 28,786 (23.6)      | 316 (6.9)              | 27,471 (24.3)         |         |
|                                                              | 2                    | 27,457 (22.5)      | 451 (9.8)              | 26,332 (23.3)         |         |
|                                                              | 1                    | 15,770 (12.9)      | 749 (16.3)             | 14,751 (13.0)         |         |
|                                                              | 0                    | 7,769 (6.4)        | 2,815 (61.4)           | 4,855 (4.3)           |         |
| ACEI prescribed/contraindicated [D]                          | 48,875 (41.9)        | 373 (15.5)         | 1,860 (42.9)           | 46,642 (42.4)         | <.0001  |
| ARB prescribed/contraindicated [D]                           | 19,473 (16.8)        | 149 (6.2)          | 537 (12.4)             | 18,787 (17.2)         | <.0001  |
| Clopidogrel prescribed/contraindicated [D]                   | 15,069 (18.5)        | 183 (10.0)         | 728 (19.1)             | 14,158 (18.7)         | <.0001  |
| OMEGA-3 fatty acid supplement prescribed/contraindicated [D] | 3,433 (6.9)          | 36 (2.4)           | 170 (7.4)              | 3,227 (7.0)           | <.0001  |
| ICD Therapy prescribed/contraindicated [D]                   | 5,835 (6.0)          | 172 (5.8)          | 526 (19.2)             | 5,137 (5.6)           | <.0001  |
| CRT-D or CRT-P prescribed/contraindicated [D]                | 7,192 (9.2)          | 162 (6.0)          | 759 (29.3)             | 6,271 (8.6)           | <.0001  |

**eTable 3.** Characteristics of patients discharged to hospice: home vs health care facility

| Variable                                            | Health Care Facilities<br>N=2,164 | Home<br>N=2,424       | P-value | Standardized<br>Differences, % |
|-----------------------------------------------------|-----------------------------------|-----------------------|---------|--------------------------------|
| <b>Demographics</b>                                 |                                   |                       |         |                                |
| Age*                                                | 87 (81 - 91)                      | 85 (79 - 90)          | <.0001  | 20.2                           |
| Female                                              | 1,263 (58.4)                      | 1,292 (53.3)          | 0.0006  | 10.2                           |
| Race                                                |                                   |                       | 0.0001  |                                |
| White                                               | 1,906 (89.7)                      | 2,051 (86.7)          |         | 9.4                            |
| Black                                               | 104 (4.9)                         | 159 (6.7)             |         | 7.8                            |
| Hispanic (any race)                                 | 44 (2.1)                          | 93 (3.9)              |         | 10.9                           |
| Asian                                               | 21 (1.0)                          | 23 (1.0)              |         | 0.2                            |
| Other (includes UTD)                                | 49 (2.3)                          | 39 (1.6)              |         | 4.7                            |
| Insurance                                           |                                   |                       | 0.8157  |                                |
| No Insurance/ND/UTD                                 | 4 (0.2)                           | 6 (0.3)               |         | 1.4                            |
| Medicare                                            | 1,293 (76.8)                      | 1,463 (75.9)          |         | 2.2                            |
| Medicaid                                            | 77 (4.6)                          | 84 (4.4)              |         | 1.1                            |
| Other                                               | 309 (18.4)                        | 375 (19.5)            |         | 2.8                            |
| Median household income, ×\$1,000, in 2015 dollars* | 51.8 (46.1 - 60.7)                | 51.1 (44.4 - 60.6)    | 0.0014  | 8.2                            |
| Median home value, ×\$1,000, in 2015 dollars*       | 163.5 (131.9 - 240.1)             | 161.3 (124.5 - 232.5) | 0.0017  | 3.2                            |
| % High school degree*                               | 88.5 (85.1 - 91.2)                | 87.8 (84.4 - 90.7)    | <.0001  | 15.3                           |
| % College degree*                                   | 28.8 (23.2 - 34)                  | 27.4 (19.8 - 33.4)    | <.0001  | 13.6                           |
| Unemployment rate*                                  | 7 (5.8 - 8.1)                     | 7.1 (5.9 - 8.3)       | 0.0133  | 9.4                            |
| Year of index discharge*                            |                                   |                       | 0.0210  | 6.7                            |
| 2014                                                | 477 (22.0)                        | 491 (20.3)            |         |                                |
| 2013                                                | 447 (20.7)                        | 489 (20.2)            |         |                                |
| 2012                                                | 340 (15.7)                        | 363 (15.0)            |         |                                |
| 2011                                                | 273 (12.6)                        | 300 (12.4)            |         |                                |
| 2010                                                | 191 (8.8)                         | 221 (9.1)             |         |                                |
| 2009                                                | 131 (6.1)                         | 166 (6.8)             |         |                                |
| 2008                                                | 95 (4.4)                          | 126 (5.2)             |         |                                |
| 2007                                                | 77 (3.6)                          | 110 (4.5)             |         |                                |
| 2006                                                | 74 (3.4)                          | 108 (4.5)             |         |                                |
| 2005                                                | 59 (2.7)                          | 50 (2.1)              |         |                                |
| LVEF Source                                         |                                   |                       | 0.2579  | 3.5                            |
| Quantitative LVEF                                   | 1,833 (92.6)                      | 2,074 (93.5)          |         |                                |
| Qualitative LVEF                                    | 147 (7.4)                         | 145 (6.5)             |         |                                |
| EF, %*                                              | 45 (26 - 58)                      | 39 (25 - 55)          | <.0001  | 15.7                           |
| EF groups*                                          |                                   |                       | <.0001  | 16.3                           |
| HFpEF, Preserved                                    | 924 (46.7)                        | 873 (39.3)            |         |                                |
| HFpEF, Borderline                                   | 240 (12.1)                        | 255 (11.5)            |         |                                |
| HFrEF, Reduced                                      | 816 (41.2)                        | 1,091 (49.2)          |         |                                |
| EF Group Missing                                    | 184 (8.5)                         | 205 (8.5)             | 0.9558  | 0.2                            |
| <b>Medical History</b>                              |                                   |                       |         |                                |
| Atrial Flutter/Fibrillation                         | 929 (45.9)                        | 1,045 (46.0)          | 0.9526  | 0.2                            |
| COPD or Asthma                                      | 595 (29.4)                        | 716 (31.5)            | 0.1331  | 4.6                            |
| Diabetes                                            | 677 (33.5)                        | 743 (32.7)            | 0.6020  | 1.6                            |
| Hyperlipidemia                                      | 886 (43.8)                        | 979 (43.1)            | 0.6489  | 1.4                            |
| Hypertension                                        | 1,500 (74.2)                      | 1,636 (72.1)          | 0.1193  | 4.8                            |
| Peripheral Vascular Disease                         | 291 (14.4)                        | 295 (13.0)            | 0.1837  | 4.1                            |
| CAD                                                 | 987 (48.8)                        | 1,197 (52.7)          | 0.0104  | 7.8                            |
| Prior MI                                            | 351 (17.4)                        | 464 (20.4)            | 0.0102  | 7.9                            |
| CVA/TIA                                             | 403 (19.9)                        | 394 (17.4)            | 0.0304  | 6.6                            |
| ICD only                                            | 117 (5.8)                         | 191 (8.4)             | 0.0009  | 10.2                           |
| Heart failure                                       | 1,336 (66.1)                      | 1,580 (69.6)          | 0.0134  | 7.6                            |
| Anemia                                              | 509 (25.2)                        | 565 (24.9)            | 0.8307  | 0.7                            |
| Pacemaker                                           | 305 (15.1)                        | 377 (16.6)            | 0.1729  | 4.2                            |
| Dialysis, chronic                                   | 34 (1.7)                          | 41 (1.8)              | 0.7557  | 1.0                            |
| Renal insufficiency, chronic (SCr>2.0)              | 575 (28.4)                        | 634 (27.9)            | 0.7121  | 1.1                            |
| Depression                                          | 281 (13.9)                        | 264 (11.6)            | 0.0260  | 6.8                            |
| Valvular Heart Disease                              | 460 (22.7)                        | 582 (25.6)            | 0.0276  | 6.7                            |
| CRT-P                                               | 13 (0.6)                          | 28 (1.2)              | 0.0471  | 6.1                            |
| CRT-D                                               | 59 (2.9)                          | 97 (4.3)              | 0.0179  | 7.3                            |
| Ischemic Etiology                                   | 1,108 (54.8)                      | 1,342 (59.1)          | 0.0043  | 8.7                            |

| Variable                                     | Health Care Facilities<br>N=2,164 | Home<br>N=2,424      | P-value | Standardized<br>Differences, % |
|----------------------------------------------|-----------------------------------|----------------------|---------|--------------------------------|
| Medical History Panel Missing                | 142 (6.6)                         | 154 (6.4)            | 0.7739  | 0.8                            |
| Smoking                                      | 89 (4.4)                          | 141 (6.3)            | 0.0076  | 8.2                            |
| <b>Meds Prior to Admission</b>               |                                   |                      |         |                                |
| Ace inhibitor                                | 312 (26.4)                        | 364 (26.8)           | 0.8177  | 0.9                            |
| Aldosterone antagonist                       | 97 (8.2)                          | 147 (10.8)           | 0.0256  | 8.9                            |
| Angiotensin receptor blocker                 | 113 (9.6)                         | 147 (10.8)           | 0.2948  | 4.2                            |
| Antiarrhythmic                               | 101 (8.6)                         | 138 (10.2)           | 0.1641  | 5.6                            |
| Antiplatelet agent (excluding aspirin)       | 162 (13.7)                        | 207 (15.3)           | 0.2733  | 4.4                            |
| Aspirin                                      | 538 (45.6)                        | 637 (46.9)           | 0.4846  | 2.8                            |
| Beta-Blocker                                 | 610 (51.7)                        | 750 (55.3)           | 0.0684  | 7.3                            |
| Ca channel blocker                           | 275 (23.3)                        | 267 (19.7)           | 0.0269  | 8.8                            |
| Diabetic Medications (Any)                   | 223 (21.9)                        | 238 (20.9)           | 0.5536  | -                              |
| Digoxin                                      | 177 (15.0)                        | 220 (16.2)           | 0.3969  | 3.4                            |
| Nitrate                                      | 187 (15.8)                        | 240 (17.7)           | 0.2136  | 5.0                            |
| Anticoagulation therapy                      | 278 (23.5)                        | 343 (25.3)           | 0.3101  | 4.0                            |
| Diuretic                                     | 742 (62.8)                        | 898 (66.2)           | 0.0786  | 7.0                            |
| Thiazide/Thiazide-like                       | 92 (7.8)                          | 95 (7.0)             | 0.4478  | 3.0                            |
| Loop                                         | 692 (58.6)                        | 850 (62.6)           | 0.0375  | 8.3                            |
| Hydralazine                                  | 56 (4.7)                          | 84 (6.2)             | 0.1110  | 6.4                            |
| Lipid lowering agent (Any)                   | 518 (43.9)                        | 603 (44.4)           | 0.7711  | 1.2                            |
| Statin                                       | 464 (39.3)                        | 545 (40.2)           | 0.6539  | 1.8                            |
| Other lipid lowering agent                   | 41 (3.5)                          | 48 (3.5)             | 0.9286  | 0.4                            |
| Omega-3 fatty acid supplement                | 32 (2.7)                          | 26 (1.9)             | 0.1821  | 5.3                            |
| Renin Inhibitor                              | 2 (0.2)                           | 2 (0.1)              | 0.8894  | 0.6                            |
| Other                                        | 625 (52.9)                        | 666 (49.1)           | 0.0535  | 7.7                            |
| Meds Prior to Admission Missing              | 983 (45.4)                        | 1,067 (44.0)         | 0.3387  | 2.8                            |
| <b>Vitals on Admission</b>                   |                                   |                      |         |                                |
| Heart Rate, bpm*                             | 85 (72 - 101)                     | 83 (70 - 98)         | 0.0012  | 10.8                           |
| SBP, mmHg*                                   | 128 (110 - 147)                   | 128 (109 - 149)      | 0.7149  | 2.4                            |
| DBP, mmHg*                                   | 69 (59 - 80)                      | 70 (60 - 81)         | 0.1329  | 5.3                            |
| BMI*                                         | 24.97 (21.61 - 29.42)             | 24.78 (21.1 - 29.58) | 0.3998  | 1.7                            |
| <b>Lipids</b>                                |                                   |                      |         |                                |
| Total Cholesterol, mg/dL*                    | 123 (100 - 152)                   | 120 (100 - 149)      | 0.6438  | 2.7                            |
| HDL, mg/dL*                                  | 37.5 (28 - 48)                    | 36 (28 - 48)         | 0.8260  | 2.6                            |
| LDL, mg/dL*                                  | 66.5 (50 - 90)                    | 68 (51 - 91.5)       | 0.5624  | 4.9                            |
| Triglycerides, mg/dL*                        | 84 (64 - 109)                     | 79 (62 - 103)        | 0.2015  | 7.0                            |
| <b>Lab Measures</b>                          |                                   |                      |         |                                |
| Serum sodium, mEq/L*                         | 138 (134 - 141)                   | 138 (134 - 141)      | 0.2918  | 3.5                            |
| Hemoglobin, g/dL*                            | 11 (9.9 - 12.5)                   | 11.4 (10 - 12.8)     | 0.0009  | 4.0                            |
| Serum creatinine, mg/dL*                     | 1.4 (1 - 2.1)                     | 1.5 (1 - 2.1)        | 0.2427  | 3.6                            |
| BUN, mg/dL*                                  | 33 (23 - 52)                      | 32 (22 - 50)         | 0.3295  | 3.3                            |
| HbA1C, %*                                    | 6.6 (5.9 - 7.2)                   | 6.4 (5.8 - 7.3)      | 0.6022  | 3.4                            |
| <b>Symptoms</b>                              |                                   |                      |         |                                |
| Admission Symptoms                           |                                   |                      |         |                                |
| - Chest pain                                 | 101 (10.6)                        | 126 (11.2)           | 0.6604  | 1.9                            |
| - Decreased appetite/early satiety           | 87 (9.1)                          | 99 (8.8)             | 0.7944  | 1.1                            |
| - Dizziness/lightheadedness/syncope          | 65 (6.8)                          | 60 (5.3)             | 0.1558  | 6.2                            |
| - Dyspnea at rest                            | 527 (55.2)                        | 608 (54.0)           | 0.5701  | 2.5                            |
| - Dyspnea on exertion                        | 496 (52.0)                        | 673 (59.8)           | 0.0004  | 15.7                           |
| - Fatigue                                    | 237 (24.8)                        | 297 (26.4)           | 0.4250  | 3.5                            |
| - Orthopnea                                  | 170 (17.8)                        | 241 (21.4)           | 0.0409  | 9.0                            |
| - Palpitations                               | 21 (2.2)                          | 26 (2.3)             | 0.8691  | 0.7                            |
| - PND                                        | 71 (7.4)                          | 93 (8.3)             | 0.4910  | 3.0                            |
| - Admission Symptoms Missing                 | 1,210 (55.9)                      | 1,298 (53.5)         | 0.1079  | 4.8                            |
| Discharge Symptoms                           |                                   |                      |         |                                |
| Unable to determine                          | 130 (13.2)                        | 126 (11.4)           |         | 5.7                            |
| Better, asymptomatic                         | 85 (8.7)                          | 192 (17.3)           |         | 25.9                           |
| Better, symptomatic                          | 305 (31.1)                        | 517 (46.6)           |         | 32.3                           |
| Unchanged                                    | 206 (21.0)                        | 159 (14.3)           |         | 17.5                           |
| Worse                                        | 256 (26.1)                        | 116 (10.5)           |         | 41.3                           |
| Risk Interventions: Symptoms Worsening       | 1,142 (68.2)                      | 1,735 (86.8)         | <.0001  | 45.5                           |
| HF Reporting: Symptoms Worsening Instruction |                                   |                      |         | -                              |
| <b>Parental Therapy</b>                      |                                   |                      |         |                                |
| None                                         | 300 (20.7)                        | 351 (21.1)           | 0.7689  | 1.1                            |

| Variable                                    | Health Care Facilities<br>N=2,164 | Home<br>N=2,424 | P-value | Standardized<br>Differences, % |
|---------------------------------------------|-----------------------------------|-----------------|---------|--------------------------------|
| Dopamine                                    | 75 (5.2)                          | 58 (3.5)        | 0.0206  | 8.3                            |
| Milrinone                                   | 32 (2.2)                          | 35 (2.1)        | 0.8465  | 0.7                            |
| Nesiritide                                  | 21 (1.4)                          | 26 (1.6)        | 0.7911  | 1.0                            |
| Nitroglycerine                              | 56 (3.9)                          | 56 (3.4)        | 0.4618  | 2.6                            |
| Vasopressin antagonist                      | 10 (0.7)                          | 11 (0.7)        | 0.9247  | 0.3                            |
| Dobutamine                                  | 80 (5.5)                          | 106 (6.4)       | 0.3124  | 3.6                            |
| Loop diuretics                              | 1,075 (74.1)                      | 1,225 (73.7)    | 0.7845  | 1.0                            |
| Intermittent bolus                          | 963 (66.4)                        | 1,110 (66.8)    | 0.8257  | 0.8                            |
| Continuous infusion                         | 108 (7.4)                         | 100 (6.0)       | 0.1108  | 5.7                            |
| Other IV vasodilator                        | 32 (2.2)                          | 26 (1.6)        | 0.1862  | 4.7                            |
| Parenteral Therapy Missing                  | 714 (33.0)                        | 762 (31.4)      | 0.2592  | 3.3                            |
| <b>Advanced Care</b>                        |                                   |                 |         |                                |
| Advanced Care Plan/Surrogate Decision Maker | 793 (74.7)                        | 864 (76.3)      | 0.3884  | 3.7                            |
| Advance Directive Executed                  | 61 (75.3)                         | 45 (66.2)       | 0.2220  | 20.2                           |
| HF Reporting: Advanced Care Plan            | 1,140 (52.7)                      | 1,233 (50.9)    | 0.2252  | 3.6                            |
| <b>In-hospital Procedure</b>                |                                   |                 |         |                                |
| No Procedures                               | 1,196 (88.1)                      | 1,364 (89.0)    | 0.4785  | 2.6                            |
| Cardiac Cath/Coronary angiography           | 23 (1.7)                          | 52 (3.4)        | 0.0042  | 10.8                           |
| PCI                                         |                                   |                 |         | -                              |
| PCI with stent                              | 2 (0.1)                           | 3 (0.2)         | 0.7552  | 1.2                            |
| Coronary artery bypass graft                | 2 (0.1)                           | 1 (0.1)         | 0.4938  | 2.5                            |
| Cardiac Valve Surgery                       | 4 (0.3)                           | 0 (0.0)         | 0.0334  | -                              |
| Right Cardiac Catheterization               | 14 (1.0)                          | 22 (1.4)        | 0.3292  | 3.7                            |
| Pacemaker                                   | 8 (0.6)                           | 3 (0.2)         | 0.0862  | 6.3                            |
| CRT-D                                       | 5 (0.4)                           | 7 (0.5)         | 0.7130  | 1.4                            |
| ICD only                                    | 3 (0.2)                           | 4 (0.3)         | 0.8278  | 0.8                            |
| Cardioversion                               | 7 (0.5)                           | 8 (0.5)         | 0.9821  | 0.1                            |
| Dialysis or Ultrafiltration unspecified     | 17 (1.3)                          | 6 (0.4)         | 0.0093  | 9.6                            |
| Intra-aortic balloon pump                   |                                   |                 |         | -                              |
| Left Ventricular assist device              | 1 (0.1)                           | 0 (0.0)         | 0.2878  | -                              |
| Mechanical ventilation                      | 58 (4.3)                          | 44 (2.9)        | 0.0413  | 7.6                            |
| Transplant (Heart)                          | 1 (0.1)                           | 0 (0.0)         | 0.2878  | -                              |
| Stress Testing                              | 18 (1.3)                          | 19 (1.2)        | 0.8354  | 0.8                            |
| Dialysis                                    | 26 (1.9)                          | 28 (1.8)        | 0.8593  | 0.7                            |
| Ultrafiltration                             | 5 (0.4)                           | 5 (0.3)         | 0.8468  | 0.7                            |
| CRT-P                                       | 1 (0.1)                           | 2 (0.1)         | 0.6363  | 1.8                            |
| Atrial Fibrillation Ablation or Surgery     | 1 (0.1)                           | 0 (0.0)         | 0.2878  | -                              |
| Procedures Missing                          | 807 (37.3)                        | 891 (36.8)      | 0.7081  | 1.1                            |
| <b>Hospital Characteristics</b>             |                                   |                 |         |                                |
| Number of Beds*                             | 369 (221 - 520)                   | 367 (221 - 508) | 0.1632  | 3.9                            |
| Geographic Region                           |                                   |                 | <.0001  |                                |
| West                                        | 204 (9.4)                         | 374 (15.4)      |         | 18.3                           |
| South                                       | 778 (36.0)                        | 918 (37.9)      |         | 4.0                            |
| Midwest                                     | 649 (30.0)                        | 561 (23.1)      |         | 15.5                           |
| Northeast                                   | 533 (24.6)                        | 571 (23.6)      |         | 2.5                            |
| Rural Location                              | 67 (3.2)                          | 148 (6.3)       | <.0001  | 14.7                           |
| Teaching Status                             | 1,435 (67.5)                      | 1,682 (71.0)    | 0.0125  | 7.5                            |
| Heart Transplant Hospital                   | 181 (11.7)                        | 144 (8.2)       | 0.0007  | 11.8                           |

**eTable 4. Trend of hospice rate in study population (121 990 patients from 438 sites)**

| Year    | Hospice<br>N (%) | Hospice Destination |                               |
|---------|------------------|---------------------|-------------------------------|
|         |                  | Home<br>N (%)       | Health Care Facility<br>N (%) |
| 2005    | 109 (1.97)       | 50 (0.90)           | 59 (1.07)                     |
| 2006    | 182 (2.09)       | 108 (1.24)          | 74 (0.85)                     |
| 2007    | 187 (2.29)       | 110 (1.34)          | 77 (0.94)                     |
| 2008    | 221 (2.61)       | 126 (1.49)          | 95 (1.12)                     |
| 2009    | 297 (2.97)       | 166 (1.66)          | 131 (1.31)                    |
| 2010    | 412 (3.34)       | 221 (1.79)          | 191 (1.55)                    |
| 2011    | 573 (3.87)       | 300 (2.03)          | 273 (1.84)                    |
| 2012    | 703 (4.33)       | 363 (2.24)          | 340 (2.09)                    |
| 2013    | 936 (5.16)       | 489 (2.70)          | 447 (2.46)                    |
| 2014    | 968 (4.94)       | 491 (2.51)          | 477 (2.43)                    |
| Total   | 4,588 (3.76)     | 2,424 (1.99)        | 2,164 (1.77)                  |
| Trend P | < 0.0001         | < 0.0001            | < 0.0001                      |

% denotes proportion of patients discharged to hospice (total and by site of hospice) who experienced readmission event.



**eTable 5. Characteristics of heart failure patients discharged to hospice over time**

| Variable                                                                       | Overall<br>N=4,588    | 2005-2008<br>N=699    | 2009-2011<br>N=1,282  | 2012-2014<br>N=2,607 | P Value |
|--------------------------------------------------------------------------------|-----------------------|-----------------------|-----------------------|----------------------|---------|
| <b>Demographics</b>                                                            |                       |                       |                       |                      |         |
| Age*                                                                           | 86 (80 - 90)          | <b>85 (79 - 90)</b>   | 85 (79 - 90)          | 86 (80 - 91)         | <.0001  |
| Female                                                                         | 2,555 (55.7)          | 402 (57.5)            | 716 (55.9)            | 1,437 (55.1)         | 0.2963  |
| Race                                                                           |                       |                       |                       |                      | 0.8508  |
| White                                                                          | 3,957 (88.1)          | 608 (89.0)            | 1,081 (87.4)          | 2,268 (88.3)         |         |
| Black                                                                          | 263 (5.9)             | 37 (5.4)              | 77 (6.2)              | 149 (5.8)            |         |
| Hispanic (any race)                                                            | 137 (3.1)             | 20 (2.9)              | 37 (3.0)              | 80 (3.1)             |         |
| Asian                                                                          | 44 (1.0)              | 3 (0.4)               | 15 (1.2)              | 26 (1.0)             |         |
| Other (includes UTD)                                                           | 88 (2.0)              | 15 (2.2)              | 27 (2.2)              | 46 (1.8)             |         |
| Insurance                                                                      |                       |                       |                       |                      | 0.4846  |
| No Insurance/Not Documented/UTD                                                | 10 (0.3)              | 4 (0.6)               | 2 (0.2)               | 4 (0.2)              |         |
| Medicare                                                                       | 2,756 (76.3)          | 498 (75.5)            | 779 (75.6)            | 1,479 (77.0)         |         |
| Medicaid                                                                       | 161 (4.5)             | 26 (3.9)              | 54 (5.2)              | 81 (4.2)             |         |
| Other                                                                          | 684 (18.9)            | 132 (20.0)            | 196 (19.0)            | 356 (18.5)           |         |
| Median household income, in 2015 dollars*                                      | 51.4 (45.4 - 60.7)    | 52.5 (46.9 - 61.4)    | 50.5 (44.5 - 57.8)    | 52 (45.9 - 61.1)     | 0.5759  |
| Median home value, in 2015 dollars*                                            | 162.4 (127.7 - 236.1) | 185.1 (130.5 - 254.9) | 159.8 (125.3 - 233.2) | 161 (127.7 - 232.5)  | 0.0020  |
| % High school degree*                                                          | 88.1 (85 - 90.8)      | 85.3 (82.6 - 88.4)    | 87.4 (84.4 - 90.4)    | 89.0 (85.9 - 91.6)   | <.0001  |
| % College degree*                                                              | 28.2 (21.6 - 33.4)    | 26.2 (19.6 - 31.8)    | 26.8 (20.4 - 31.2)    | 29.1 (22.8 - 35.8)   | <.0001  |
| Unemployment rate*                                                             | 7 (5.8 - 8.2)         | 4.3 (4 - 5.3)         | 8.2 (7.4 - 9.4)       | 6.9 (5.8 - 7.8)      | <.0001  |
| LVEF Source                                                                    |                       |                       |                       |                      | <.0001  |
| Quantitative LVEF                                                              | 3,907 (93.0)          | 538 (86.6)            | 1,076 (91.5)          | 2,293 (95.5)         |         |
| Qualitative LVEF                                                               | 292 (7.0)             | 83 (13.4)             | 100 (8.5)             | 109 (4.5)            |         |
| EF, %*                                                                         | 40 (25 - 56)          | <b>38 (25 - 55)</b>   | 40 (25 - 55)          | 43 (25 - 57)         | 0.0015  |
| EF groups*                                                                     |                       |                       |                       |                      | 0.0270  |
| HFpEF, Preserved                                                               | 1,797 (42.8)          | <b>251 (40.4)</b>     | 486 (41.3)            | 1,060 (44.1)         |         |
| HFpEF, Borderline                                                              | 495 (11.8)            | 63 (10.1)             | 152 (12.9)            | 280 (11.7)           |         |
| HFrEF, Reduced                                                                 | 1,907 (45.4)          | 307 (49.4)            | 538 (45.7)            | 1,062 (44.2)         |         |
| EF groups missing                                                              | 389 (8.5)             | 78 (11.2)             | 106 (8.3)             | 205 (7.9)            | 0.0253  |
| <b>Medical History</b>                                                         |                       |                       |                       |                      |         |
| Atrial Flutter/Fibrillation                                                    | 1,974 (46.0)          | 244 (37.3)            | 496 (45.8)            | 1,234 (48.3)         | <.0001  |
| COPD or Asthma                                                                 | 1,311 (30.5)          | 194 (29.6)            | 320 (29.5)            | 797 (31.2)           | 0.2729  |
| Diabetes                                                                       | 1,420 (33.1)          | 215 (32.8)            | 360 (33.2)            | 845 (33.1)           | 0.9641  |
| Hyperlipidemia                                                                 | 1,865 (43.5)          | 202 (30.8)            | 453 (41.8)            | 1,210 (47.4)         | <.0001  |
| Hypertension                                                                   | 3,136 (73.1)          | 430 (65.6)            | 776 (71.7)            | 1,930 (75.6)         | <.0001  |
| Peripheral Vascular Disease                                                    | 586 (13.7)            | 91 (13.9)             | 148 (13.7)            | 347 (13.6)           | 0.8551  |
| CAD                                                                            | 2,184 (50.9)          | 314 (47.9)            | 534 (49.3)            | 1,336 (52.3)         | 0.0198  |
| Prior MI                                                                       | 815 (19.0)            | 105 (16.0)            | 231 (21.3)            | 479 (18.8)           | 0.8307  |
| CVA/TIA                                                                        | 797 (18.6)            | 103 (15.7)            | 191 (17.6)            | 503 (19.7)           | 0.0135  |
| ICD only                                                                       | 308 (7.2)             | 50 (7.6)              | 72 (6.6)              | 186 (7.3)            | 0.8985  |
| Heart failure                                                                  | 2,916 (67.9)          | 324 (49.5)            | 766 (70.7)            | 1,826 (71.5)         | <.0001  |
| Anemia                                                                         | 1,074 (25.0)          | 148 (22.6)            | 273 (25.2)            | 653 (25.6)           | 0.2049  |
| Pacemaker                                                                      | 682 (15.9)            | 96 (14.7)             | 167 (15.4)            | 419 (16.4)           | 0.2343  |
| Dialysis, chronic                                                              | 75 (1.7)              | 13 (2.0)              | 24 (2.2)              | 38 (1.5)             | 0.1508  |
| Renal insufficiency, chronic (SCr>2.0)                                         | 1,209 (28.2)          | 181 (27.6)            | 292 (27.0)            | 736 (28.8)           | 0.3003  |
| Depression                                                                     | 545 (12.7)            | 81 (12.4)             | 134 (12.4)            | 330 (12.9)           | 0.6058  |
| Valvular Heart Disease                                                         | 1,042 (24.3)          | 86 (13.1)             | 269 (24.8)            | 687 (26.9)           | <.0001  |
| CRT-P (cardiac resynchronization therapy-pacing only)                          | 41 (1.0)              | 0 (0.0)               | 12 (1.1)              | 29 (1.1)             | 0.0463  |
| CRT-D (cardiac resynchronization therapy with ICD)                             | 156 (3.6)             | 0 (0.0)               | 36 (3.3)              | 120 (4.7)            | <.0001  |
| Ischemic Etiology: Med Hx of CAD, MI, prior PCI, prior CABG, or prior PCI/CABG | 2,450 (57.1)          | 354 (54.0)            | 613 (56.6)            | 1,483 (58.1)         | 0.0742  |
| Medical History Panel Missing                                                  | 296 (6.5)             | 44 (6.3)              | 199 (15.5)            | 53 (2.0)             | <.0001  |
| Smoking                                                                        | 230 (5.4)             | 35 (6.2)              | 79 (6.8)              | 116 (4.6)            | 0.0108  |
| <b>Meds Prior to Admission</b>                                                 |                       |                       |                       |                      |         |
| ACEi/ARB [D]                                                                   | 927 (36.5)            | 224 (38.8)            | 299 (34.5)            | 404 (36.9)           | 0.7640  |
| Aldosterone antagonist                                                         | 244 (9.6)             | 59 (10.2)             | 77 (8.9)              | 108 (9.9)            | 0.9772  |
| Anticoagulation therapy                                                        | 621 (24.5)            | 127 (22.0)            | 189 (21.8)            | 305 (27.9)           | 0.0015  |
| Aspirin                                                                        | 1,175 (46.3)          | 220 (38.1)            | 397 (45.8)            | 558 (51.0)           | <.0001  |
| Beta-Blocker                                                                   | 1,360 (53.6)          | 160 (27.7)            | 506 (58.4)            | 694 (63.4)           | <.0001  |
| Diabetic Medications (Any) [D]                                                 | 461 (21.4)            | 34 (19.1)             | 167 (19.0)            | 260 (23.6)           | 0.0109  |
| Hydralazine                                                                    | 140 (5.5)             | 29 (5.0)              | 47 (5.4)              | 64 (5.9)             | 0.4710  |

| Variable                                                     | Overall<br>N=4,588    | 2005-2008<br>N=699    | 2009-2011<br>N=1,282  | 2012-2014<br>N=2,607  | P Value |
|--------------------------------------------------------------|-----------------------|-----------------------|-----------------------|-----------------------|---------|
| Lipid lowering agent (Any)                                   | 1,121 (44.2)          | 206 (35.6)            | 400 (46.2)            | 515 (47.1)            | <.0001  |
| Total of prior medications (max=8)*                          | 2 (1 - 3)             | 2 (1 - 3)             | 2 (1 - 3)             | 3 (2 - 4)             | <.0001  |
| Total of prior medications (max=8)                           |                       |                       |                       |                       | <.0001  |
| 7                                                            | 2 (0.1)               | 0 (0.0)               | 1 (0.1)               | 1 (0.1)               |         |
| 6                                                            | 33 (1.3)              | 2 (0.3)               | 9 (1.0)               | 22 (2.0)              |         |
| 5                                                            | 140 (5.5)             | 12 (2.1)              | 40 (4.5)              | 88 (8.0)              |         |
| 4                                                            | 396 (15.5)            | 41 (7.0)              | 144 (16.3)            | 211 (19.2)            |         |
| 3                                                            | 600 (23.4)            | 112 (19.2)            | 217 (24.6)            | 271 (24.6)            |         |
| 2                                                            | 608 (23.7)            | 166 (28.5)            | 202 (22.9)            | 240 (21.8)            |         |
| 1                                                            | 537 (21.0)            | 155 (26.6)            | 190 (21.6)            | 192 (17.5)            |         |
| 0                                                            | 247 (9.6)             | 94 (16.2)             | 78 (8.9)              | 75 (6.8)              |         |
| Ace inhibitor                                                | 676 (26.6)            | 169 (29.2)            | 229 (26.4)            | 278 (25.4)            | 0.1147  |
| Angiotensin receptor blocker                                 | 260 (10.2)            | 61 (10.6)             | 70 (8.1)              | 129 (11.8)            | 0.1425  |
| Antiarrhythmic                                               | 239 (9.4)             | 45 (7.8)              | 81 (9.4)              | 113 (10.3)            | 0.0988  |
| Antiplatelet agent (excluding aspirin)                       | 369 (14.5)            | 78 (13.5)             | 134 (15.5)            | 157 (14.4)            | 0.8469  |
| Ca channel blocker                                           | 542 (21.4)            | 111 (19.2)            | 164 (18.9)            | 267 (24.4)            | 0.0031  |
| Digoxin                                                      | 397 (15.6)            | 125 (21.6)            | 141 (16.3)            | 131 (12.0)            | <.0001  |
| Nitrate                                                      | 427 (16.8)            | 114 (19.7)            | 142 (16.4)            | 171 (15.6)            | 0.0531  |
| Diuretic                                                     | 1,640 (64.6)          | 378 (65.4)            | 562 (64.9)            | 700 (64.0)            | 0.5418  |
| Thiazide/Thiazide-like                                       | 187 (7.4)             | 47 (8.1)              | 73 (8.4)              | 67 (6.1)              | 0.0660  |
| Loop                                                         | 1,542 (60.8)          | 347 (60.0)            | 530 (61.2)            | 665 (60.8)            | 0.8429  |
| Statin                                                       | 1,009 (39.8)          | 174 (30.1)            | 337 (38.9)            | 498 (45.5)            | <.0001  |
| Other lipid lowering agent                                   | 89 (3.5)              | 27 (4.7)              | 37 (4.3)              | 25 (2.3)              | 0.0045  |
| Omega-3 fatty acid supplement                                | 58 (2.3)              | 0 (0.0)               | 23 (2.7)              | 35 (3.2)              | 0.0002  |
| Renin Inhibitor                                              | 4 (0.2)               | 0 (0.0)               | 0 (0.0)               | 4 (0.4)               | 0.0343  |
| Other                                                        | 1,291 (50.9)          | 303 (52.4)            | 435 (50.2)            | 553 (50.5)            | 0.5647  |
| Meds Prior to Admission are Missing? [D]                     | 2,050 (44.7)          | 121 (17.3)            | 416 (32.4)            | 1,513 (58.0)          | <.0001  |
| <b>Vitals on Admission</b>                                   |                       |                       |                       |                       |         |
| Heart Rate, bpm*                                             | 84 (71 - 100)         | 84 (71 - 100)         | 84 (70 - 100)         | 84 (71 - 99)          | 0.8236  |
| SBP, mmHg*                                                   | 128 (110 - 148)       | 124 (108 - 145)       | 129 (111 - 149)       | 128 (110 - 148)       | 0.1280  |
| DBP, mmHg*                                                   | 69 (59 - 80)          | 68 (58 - 80)          | 70 (60 - 80)          | 69 (59 - 80)          | 0.4365  |
| BMI*                                                         | 24.93 (21.33 - 29.53) | 24.36 (21.09 - 29.13) | 24.92 (21.61 - 29.34) | 25.21 (21.46 - 29.86) | 0.0468  |
| <b>Discharge Meds</b>                                        |                       |                       |                       |                       |         |
| ACEi/ARB [D]                                                 | 518 (21.5)            | 0 (NA)                | 14 (29.8)             | 504 (21.3)            | 0.1617  |
| Aldosterone Antagonist prescribed/contraindicated [D]        | 253 (7.8)             | 14 (5.9)              | 28 (5.1)              | 211 (8.7)             | <.0001  |
| Anticoagulation Therapy prescribed/contraindicated [D]       | 410 (12.7)            | 22 (9.0)              | 37 (6.7)              | 351 (14.4)            | <.0001  |
| ASA prescribed/contraindicated [D]                           | 501 (38.8)            | 0 (NA)                | 3 (50.0)              | 498 (38.7)            | 0.8163  |
| Beta Blocker prescribed/contraindicated [D]                  | 1,159 (46.9)          | 0 (NA)                | 33 (60.0)             | 1,126 (46.6)          | 0.0742  |
| Diabetic Tx prescribed/contraindicated [D]                   | 389 (21.4)            | 37 (28.5)             | 133 (21.4)            | 219 (20.5)            | 0.0012  |
| Hydralazine Nitrate prescribed/contraindicated [D]           | 174 (5.5)             | 14 (7.3)              | 21 (3.8)              | 139 (5.8)             | <.0001  |
| Lipid Lowering Med(s) prescribed/contraindicated [D]         | 328 (27.1)            | 0 (NA)                | 2 (33.3)              | 326 (27.1)            | 0.7907  |
| Total of discharge medications (max=8)*                      | 0 (0 - 1)             | 0 (0 - 0)             | 0 (0 - 0)             | 1 (0 - 2)             | <.0001  |
| Total of discharge medications (max=8)                       |                       |                       |                       |                       | <.0001  |
| 6                                                            | 18 (0.4)              | 0 (0.0)               | 0 (0.0)               | 18 (0.7)              |         |
| 5                                                            | 69 (1.5)              | 0 (0.0)               | 2 (0.2)               | 67 (2.6)              |         |
| 4                                                            | 170 (3.7)             | 0 (0.0)               | 2 (0.2)               | 168 (6.4)             |         |
| 3                                                            | 316 (6.9)             | 2 (0.3)               | 8 (0.6)               | 306 (11.7)            |         |
| 2                                                            | 451 (9.8)             | 7 (1.0)               | 30 (2.3)              | 414 (15.9)            |         |
| 1                                                            | 749 (16.3)            | 67 (9.6)              | 169 (13.2)            | 513 (19.7)            |         |
| 0                                                            | 2,815 (61.4)          | 623 (89.1)            | 1,071 (83.5)          | 1,121 (43.0)          |         |
| ACEi prescribed/contraindicated [D]                          | 373 (15.5)            | 0 (NA)                | 9 (19.1)              | 364 (15.4)            | 0.2452  |
| ARB prescribed/contraindicated [D]                           | 149 (6.2)             | 0 (NA)                | 5 (10.9)              | 144 (6.1)             | 0.3314  |
| Clopidogrel prescribed/contraindicated [D]                   | 183 (10.0)            | 10 (4.2)              | 23 (6.3)              | 150 (12.2)            | <.0001  |
| OMEGA-3 fatty acid supplement prescribed/contraindicated [D] | 36 (2.4)              | 0 (0.0)               | 5 (1.4)               | 31 (2.7)              | <.0001  |
| ICD Therapy prescribed/contraindicated [D]                   | 172 (5.8)             | 2 (1.1)               | 14 (2.8)              | 156 (6.9)             | <.0001  |
| CRT-D or CRT-P                                               | 162 (6.0)             | 0 (0.0)               | 19 (5.5)              | 143 (6.1)             | <.0001  |

| Variable                                                             | Overall<br>N=4,588 | 2005-2008<br>N=699      | 2009-2011<br>N=1,282     | 2012-2014<br>N=2,607 | P Value |
|----------------------------------------------------------------------|--------------------|-------------------------|--------------------------|----------------------|---------|
| prescribed/contraindicated [D]                                       |                    |                         |                          |                      |         |
| <b>Lipids</b>                                                        |                    |                         |                          |                      |         |
| Total Cholesterol, mg/dL*                                            | 122 (100 - 150)    | 122 (104 - 150)         | 120.5 (100 - 150)        | 122 (99 - 149)       | 0.6761  |
| HDL, mg/dL*                                                          | 37 (28 - 48)       | 35 (26 - 45)            | 38 (28 - 49)             | 37.5 (29 - 48)       | 0.1390  |
| LDL, mg/dL*                                                          | 67.5 (51 - 91)     | 72 (55 - 91)            | 68 (52 - 91)             | 64.5 (49 - 90)       | 0.0752  |
| Triglycerides, mg/dL*                                                | 82 (62 - 107)      | 85 (65 - 104)           | 77 (59 - 102)            | 82.5 (62 - 111)      | 0.6617  |
| <b>Lab Measures</b>                                                  |                    |                         |                          |                      |         |
| Serum sodium, mEq/L*                                                 | 138 (134 - 141)    | 137 (134 - 140)         | 138 (134 - 141)          | 138 (135 - 141)      | 0.0007  |
| Hemoglobin, g/dL*                                                    | 11.3 (10 - 12.7)   | <b>11.5 (10.1 - 13)</b> | <b>11.2 (9.9 - 12.6)</b> | 11.1 (9.9 - 12.5)    | 0.0029  |
| Serum creatinine, mg/dL*                                             | 1.5 (1 - 2.1)      | 1.5 (1.1 - 2.2)         | 1.5 (1.1 - 2.1)          | 1.4 (1 - 2)          | 0.0030  |
| BUN, mg/dL*                                                          | 33 (22 - 51)       | 34 (23 - 54)            | 32 (22 - 52)             | 32 (22 - 48)         | 0.1704  |
| HbA1C, %*                                                            | 6.5 (5.85 - 7.25)  | 6.55 (6 - 7.5)          | 6.6 (6.1 - 7.4)          | 6.3 (5.6 - 7.2)      | 0.0072  |
| <b>Symptoms</b>                                                      |                    |                         |                          |                      |         |
| Admission Chest pain                                                 | 227 (10.9)         | 65 (12.4)               | 76 (11.2)                | 86 (9.8)             | 0.1178  |
| Admission Decreased appetite/early satiety                           | 186 (8.9)          | 45 (8.6)                | 60 (8.8)                 | 81 (9.2)             | 0.6886  |
| Admission Dizziness/lightheadedness/syncope                          | 125 (6.0)          | 28 (5.4)                | 44 (6.5)                 | 53 (6.0)             | 0.7182  |
| Admission Dyspnea at rest                                            | 1,135 (54.6)       | 289 (55.3)              | 342 (50.4)               | 504 (57.3)           | 0.1879  |
| Admission Dyspnea on exertion                                        | 1,169 (56.2)       | 272 (52.0)              | 404 (59.6)               | 493 (56.1)           | 0.3297  |
| Admission Fatigue                                                    | 534 (25.7)         | 121 (23.1)              | 188 (27.7)               | 225 (25.6)           | 0.5054  |
| Admission Orthopnea                                                  | 411 (19.8)         | 97 (18.5)               | 131 (19.3)               | 183 (20.8)           | 0.2781  |
| Admission Palpitations                                               | 47 (2.3)           | 9 (1.7)                 | 19 (2.8)                 | 19 (2.2)             | 0.7885  |
| Admission PND                                                        | 164 (7.9)          | 44 (8.4)                | 45 (6.6)                 | 75 (8.5)             | 0.6878  |
| Admission Symptoms are Missing? [D]                                  | 2,508 (54.7)       | 176 (25.2)              | 604 (47.1)               | 1,728 (66.3)         | <.0001  |
| <b>Discharge Symptoms</b>                                            |                    |                         |                          |                      | 0.0243  |
| Unable to determine                                                  | 256 (12.2)         | 52 (10.4)               | 91 (13.3)                | 113 (12.5)           |         |
| Better, asymptomatic                                                 | 277 (13.2)         | 65 (13.0)               | 96 (14.0)                | 116 (12.8)           |         |
| Better, symptomatic                                                  | 822 (39.3)         | 203 (40.6)              | 248 (36.2)               | 371 (40.9)           |         |
| Unchanged                                                            | 365 (17.4)         | 105 (21.0)              | 126 (18.4)               | 134 (14.8)           |         |
| Worse                                                                | 372 (17.8)         | <b>75 (15.0)</b>        | <b>124 (18.1)</b>        | <b>173 (19.1)</b>    |         |
| Risk Interventions: Symptoms Worsening                               | 2,877 (78.3)       | 438 (73.5)              | 798 (76.7)               | 1,641 (80.5)         | <.0001  |
| <b>Parental Therapy</b>                                              |                    |                         |                          |                      |         |
| None                                                                 | 651 (20.9)         | 432 (77.0)              | 125 (10.7)               | 94 (6.8)             | <.0001  |
| Dopamine                                                             | 133 (4.3)          | 38 (6.8)                | 54 (4.6)                 | 41 (3.0)             | 0.0002  |
| Milrinone                                                            | 67 (2.2)           | 7 (1.2)                 | 30 (2.6)                 | 30 (2.2)             | 0.4893  |
| Nesiritide                                                           | 47 (1.5)           | 31 (5.5)                | 15 (1.3)                 | 1 (0.1)              | <.0001  |
| Nitroglycerine                                                       | 112 (3.6)          | 0 (0.0)                 | 56 (4.8)                 | 56 (4.0)             | 0.0033  |
| Vasopressin antagonist                                               | 21 (0.7)           | 0 (0.0)                 | 8 (0.7)                  | 13 (0.9)             | 0.0362  |
| Dobutamine                                                           | 186 (6.0)          | 46 (8.2)                | 76 (6.5)                 | 64 (4.6)             | 0.0016  |
| Loop diuretics                                                       | 2,300 (73.9)       | 20 (3.6)                | 1,010 (86.5)             | 1,270 (91.8)         | <.0001  |
| Intermittent bolus                                                   | 2,073 (66.6)       | 18 (3.2)                | 901 (77.2)               | 1,154 (83.4)         | <.0001  |
| Continuous infusion                                                  | 208 (6.7)          | 0 (0.0)                 | 102 (8.7)                | 106 (7.7)            | <.0001  |
| Other IV vasodilator                                                 | 58 (1.9)           | 13 (2.3)                | 14 (1.2)                 | 31 (2.2)             | 0.4782  |
| Parenteral Therapy Missing [D]                                       | 1,476 (32.2)       | 138 (19.7)              | 115 (9.0)                | 1,223 (46.9)         | <.0001  |
| <b>Advanced Care</b>                                                 |                    |                         |                          |                      |         |
| Advanced Care Plan/Surrogate Decision Maker Documented Or Discussed? | 1,657 (75.6)       | 0 (NA)                  | 98 (58.0)                | 1,559 (77.0)         | <.0001  |
| Advance Directive Executed                                           | 106 (71.1)         | 0 (NA)                  | 0 (NA)                   | 106 (71.1)           | -       |
| HF Reporting: Advanced Care Plan In-hospital Procedure               | 2,373 (51.7)       | 0 (0.0)                 | 185 (14.4)               | 2,188 (83.9)         | <.0001  |
| No Procedures                                                        | 2,560 (88.6)       | <b>571 (92.5)</b>       | 815 (86.7)               | 1,174 (88.1)         | 0.0429  |
| Cardiac Cath/Coronary angiography                                    | 75 (2.6)           | 12 (1.9)                | 22 (2.3)                 | 41 (3.1)             | 0.1152  |
| PCI with stent                                                       | 5 (0.2)            | 0 (0.0)                 | 2 (0.2)                  | 3 (0.2)              | 0.3482  |
| Coronary artery bypass graft                                         | 3 (0.1)            | 0 (0.0)                 | 1 (0.1)                  | 2 (0.2)              | 0.3701  |
| Cardiac Valve Surgery                                                | 4 (0.1)            | 0 (0.0)                 | 1 (0.1)                  | 3 (0.2)              | 0.2004  |
| Right Cardiac Catheterization                                        | 36 (1.2)           | 6 (1.0)                 | 11 (1.2)                 | 19 (1.4)             | 0.3813  |
| Pacemaker                                                            | 11 (0.4)           | 3 (0.5)                 | 5 (0.5)                  | 3 (0.2)              | 0.2629  |
| CRT-D (cardiac resynchronization therapy with ICD)                   | 12 (0.4)           | 2 (0.3)                 | 7 (0.7)                  | 3 (0.2)              | 0.3604  |
| ICD only                                                             | 7 (0.2)            | 4 (0.6)                 | 1 (0.1)                  | 2 (0.2)              | 0.1012  |
| Cardioversion                                                        | 15 (0.5)           | 2 (0.3)                 | 5 (0.5)                  | 8 (0.6)              | 0.4683  |
| Dialysis or Ultrafiltration unspecified                              | 23 (0.8)           | 18 (2.9)                | 4 (0.4)                  | 1 (0.1)              | <.0001  |
| Left Ventricular assist device                                       | 1 (0.0)            | 0 (0.0)                 | 1 (0.1)                  | 0 (0.0)              | 0.6431  |
| Mechanical ventilation                                               | 102 (3.5)          | 11 (1.8)                | 43 (4.6)                 | 48 (3.6)             | 0.2166  |
| Transplant (Heart)                                                   | 1 (0.0)            | 0 (0.0)                 | 1 (0.1)                  | 0 (0.0)              | 0.6431  |

| Variable                                              | Overall<br>N=4,588 | 2005-2008<br>N=699 | 2009-2011<br>N=1,282 | 2012-2014<br>N=2,607 | P Value |
|-------------------------------------------------------|--------------------|--------------------|----------------------|----------------------|---------|
| Stress Testing                                        | 37 (1.3)           | 0 (0.0)            | 10 (1.1)             | 27 (2.0)             | 0.0002  |
| Dialysis                                              | 54 (1.9)           | 0 (0.0)            | 26 (2.8)             | 28 (2.1)             | 0.0264  |
| Ultrafiltration                                       | 10 (0.3)           | 0 (0.0)            | 5 (0.5)              | 5 (0.4)              | 0.3888  |
| CRT-P (cardiac resynchronization therapy-pacing only) | 3 (0.1)            | 0 (0.0)            | 1 (0.1)              | 2 (0.2)              | 0.3701  |
| Atrial Fibrillation Ablation or Surgery               | 1 (0.0)            | 0 (0.0)            | 0 (0.0)              | 1 (0.1)              | 0.3137  |
| Procedures are Missing? [D]                           | 1,698 (37.0)       | 82 (11.7)          | 342 (26.7)           | 1,274 (48.9)         | <.0001  |
| <b>Hospital Characteristics</b>                       |                    |                    |                      |                      |         |
| Number of Beds*                                       | 368 (221 - 508)    | 372 (217 - 571)    | 374 (221 - 539)      | 367 (221 - 493)      | 0.0959  |
| Geographic Region                                     |                    |                    |                      |                      | 0.0459  |
| West                                                  | 578 (12.6)         | 106 (15.2)         | 160 (12.5)           | 312 (12.0)           |         |
| South                                                 | 1,692 (36.9)       | 277 (39.6)         | 445 (34.7)           | 970 (37.2)           |         |
| Midwest                                               | 1,210 (26.4)       | 153 (21.9)         | 342 (26.7)           | 715 (27.4)           |         |
| Northeast                                             | 1,108 (24.1)       | 163 (23.3)         | 335 (26.1)           | 610 (23.4)           |         |
| Rural Location                                        | 215 (4.8)          | <b>46 (6.9)</b>    | <b>68 (5.5)</b>      | <b>101 (3.9)</b>     | 0.0005  |
| Teaching Status                                       | 3,117 (69.3)       | <b>432 (63.3)</b>  | <b>867 (69.0)</b>    | <b>1,818 (71.1)</b>  | 0.0004  |
| Heart Transplant Hospital                             | 325 (9.8)          | 46 (14.8)          | 98 (11.5)            | 181 (8.4)            | <.0001  |

**eTable 6.** Survival times in heart failure patients

| Group                  | N       | Survival Times in Years* |       |       | Survival < 3 Days |       | Survival ≥ 6 Months |       |
|------------------------|---------|--------------------------|-------|-------|-------------------|-------|---------------------|-------|
|                        |         | Median                   | Q1    | Q3    | N                 | %     | N                   | %     |
| Other HF               | 113,045 | 2.066                    | 0.605 | 4.888 | 425               | 0.38  | 88,086              | 77.92 |
| Advanced HF            | 4,357   | 0.871                    | 0.214 | 3.000 | 45                | 1.03  | 2,649               | 60.80 |
| Hospice                | 4,588   | 0.030                    | 0.008 | 0.173 | 1,034             | 22.54 | 690                 | 15.04 |
| - Home                 | 2,424   | 0.068                    | 0.016 | 0.362 | 295               | 12.17 | 516                 | 21.29 |
| - Health Care Facility | 2,164   | 0.014                    | 0.005 | 0.055 | 739               | 34.15 | 174                 | 8.04  |

\* Median survival times were based on product-limit estimates.

**eTable 7.** Trends in observed median survival in hospice

| Year | Group    | N     | Median | Q1    | Q3    |
|------|----------|-------|--------|-------|-------|
| 2005 | Other    | 5100  | 2.186  | 0.642 | 5.055 |
|      | Advanced | 319   | 0.871  | 0.219 | 2.438 |
|      | Hospice  | 109   | 0.022  | 0.008 | 0.121 |
| 2006 | Other    | 8088  | 2.182  | 0.658 | 5.174 |
|      | Advanced | 431   | 1.175  | 0.247 | 3.641 |
|      | Hospice  | 182   | 0.055  | 0.011 | 0.266 |
| 2007 | Other    | 7641  | 2.351  | 0.710 | 5.216 |
|      | Advanced | 354   | 0.866  | 0.211 | 2.896 |
|      | Hospice  | 187   | 0.027  | 0.008 | 0.186 |
| 2008 | Other    | 7872  | 2.310  | 0.710 | 5.090 |
|      | Advanced | 378   | 1.119  | 0.238 | 3.422 |
|      | Hospice  | 221   | 0.030  | 0.005 | 0.173 |
| 2009 | Other    | 9259  | 2.145  | 0.666 | 5.036 |
|      | Advanced | 429   | 0.937  | 0.203 | 3.096 |
|      | Hospice  | 297   | 0.025  | 0.008 | 0.123 |
| 2010 | Other    | 11408 | 2.071  | 0.597 | 4.818 |
|      | Advanced | 532   | 0.837  | 0.253 | 2.970 |
|      | Hospice  | 412   | 0.036  | 0.008 | 0.225 |
| 2011 | Other    | 13689 | 2.011  | 0.584 | >4    |
|      | Advanced | 543   | 0.745  | 0.189 | 2.866 |
|      | Hospice  | 573   | 0.027  | 0.005 | 0.164 |
| 2012 | Other    | 15059 | 1.956  | 0.573 | >3    |
|      | Advanced | 479   | 0.855  | 0.211 | >3    |
|      | Hospice  | 703   | 0.038  | 0.011 | 0.181 |
| 2013 | Other    | 16753 | 1.948  | 0.573 | >2    |
|      | Advanced | 446   | 0.841  | 0.189 | >2    |
|      | Hospice  | 936   | 0.036  | 0.008 | 0.227 |
| 2014 | Other    | 18176 | >1     | 0.553 | >1    |
|      | Advanced | 446   | 0.773  | 0.184 | >1    |
|      | Hospice  | 968   | 0.022  | 0.008 | 0.126 |

**eTable 8.** Characteristics of patients discharged to hospice who survived <7 days, 7 days-1 year, and >1 year

| Variable                                              | Overall<br>N=4,588    | <=7d<br>N=1,991       | <=1y<br>N=2,141       | >1y<br>N=456          | P Value |
|-------------------------------------------------------|-----------------------|-----------------------|-----------------------|-----------------------|---------|
| <b>Demographics</b>                                   |                       |                       |                       |                       |         |
| Age*                                                  | 86 (80 - 90)          | 86 (80 - 90)          | 86 (80 - 91)          | 86 (79 - 91)          | 0.9872  |
| Female                                                | 2,555 (55.7)          | 1,070 (53.7)          | 1,195 (55.8)          | 290 (63.6)            | 0.0016  |
| Race                                                  |                       |                       |                       |                       | 0.0002  |
| White                                                 | 3,957 (88.1)          | 1,754 (89.9)          | 1,835 (87.5)          | 368 (83.3)            |         |
| Black                                                 | 263 (5.9)             | 84 (4.3)              | 137 (6.5)             | 42 (9.5)              |         |
| Hispanic (any race)                                   | 137 (3.1)             | 54 (2.8)              | 67 (3.2)              | 16 (3.6)              |         |
| Asian                                                 | 44 (1.0)              | 17 (0.9)              | 20 (1.0)              | 7 (1.6)               |         |
| Other (includes UTD)                                  | 88 (2.0)              | 41 (2.1)              | 38 (1.8)              | 9 (2.0)               |         |
| Insurance                                             |                       |                       |                       |                       | 0.0843  |
| No Insurance/Not Documented/UTD                       | 10 (0.3)              | 3 (0.2)               | 6 (0.4)               | 1 (0.3)               |         |
| Medicare                                              | 2,756 (76.3)          | 1,220 (77.3)          | 1,262 (75.5)          | 274 (75.7)            |         |
| Medicaid                                              | 161 (4.5)             | 57 (3.6)              | 81 (4.8)              | 23 (6.4)              |         |
| Other                                                 | 684 (18.9)            | 298 (18.9)            | 322 (19.3)            | 64 (17.7)             |         |
| Median household income, in 2015 dollars*             | 51.4 (45.4 - 60.7)    | 51.7 (45.5 - 60.9)    | 51.2 (45.5 - 60.8)    | 50.9 (44.7 - 59)      | 0.0815  |
| Median home value, in 2015 dollars*                   | 162.4 (127.7 - 236.1) | 163.7 (129.3 - 240.8) | 161.6 (127.4 - 234.3) | 161.4 (126.4 - 227.4) | 0.1218  |
| % High school degree*                                 | 88.1 (85 - 90.8)      | 88.1 (85 - 90.9)      | 88.2 (85 - 90.8)      | 88 (84.5 - 90.5)      | 0.4493  |
| % College degree*                                     | 28.2 (21.6 - 33.4)    | 28.3 (21.7 - 33.3)    | 28.2 (21.7 - 34.1)    | 27.5 (20.4 - 33.2)    | 0.5062  |
| Unemployment rate*                                    | 7 (5.8 - 8.2)         | 7 (5.8 - 8.1)         | 7.1 (5.9 - 8.3)       | 7.2 (5.9 - 8.1)       | 0.0700  |
| Year of index discharge*                              |                       |                       |                       |                       | 0.0636  |
| 2014                                                  | 968 (21.1)            | 470 (23.6)            | 415 (19.4)            | 83 (18.2)             |         |
| 2013                                                  | 936 (20.4)            | 391 (19.6)            | 430 (20.1)            | 115 (25.2)            |         |
| 2012                                                  | 703 (15.3)            | 276 (13.9)            | 365 (17.0)            | 62 (13.6)             |         |
| 2011                                                  | 573 (12.5)            | 253 (12.7)            | 270 (12.6)            | 50 (11.0)             |         |
| 2010                                                  | 412 (9.0)             | 165 (8.3)             | 203 (9.5)             | 44 (9.6)              |         |
| 2009                                                  | 297 (6.5)             | 137 (6.9)             | 138 (6.4)             | 22 (4.8)              |         |
| 2008                                                  | 221 (4.8)             | 98 (4.9)              | 98 (4.6)              | 25 (5.5)              |         |
| 2007                                                  | 187 (4.1)             | 85 (4.3)              | 81 (3.8)              | 21 (4.6)              |         |
| 2006                                                  | 182 (4.0)             | 62 (3.1)              | 94 (4.4)              | 26 (5.7)              |         |
| 2005                                                  | 109 (2.4)             | 54 (2.7)              | 47 (2.2)              | 8 (1.8)               |         |
| LVEF Source                                           |                       |                       |                       |                       | 0.5564  |
| Quantitative LVEF                                     | 3,907 (93.0)          | 1,688 (92.7)          | 1,835 (93.4)          | 384 (92.8)            |         |
| Qualitative LVEF                                      | 292 (7.0)             | 133 (7.3)             | 129 (6.6)             | 30 (7.2)              |         |
| EF, %*                                                | 40 (25 - 56)          | 45 (25 - 58)          | 39 (25 - 55)          | 45 (27 - 58)          | 0.0213  |
| EF groups*                                            |                       |                       |                       |                       | 0.0069  |
| HFpEF, Preserved                                      | 1,797 (42.8)          | 841 (46.2)            | 768 (39.1)            | 188 (45.4)            |         |
| HFpEF, Borderline                                     | 495 (11.8)            | 206 (11.3)            | 231 (11.8)            | 58 (14.0)             |         |
| HFrEF, Reduced                                        | 1,907 (45.4)          | 774 (42.5)            | 965 (49.1)            | 168 (40.6)            |         |
| EF groups missing                                     | 389 (8.5)             | 170 (8.5)             | 177 (8.3)             | 42 (9.2)              | 0.9338  |
| <b>Medical History</b>                                |                       |                       |                       |                       |         |
| Atrial Flutter/Fibrillation                           | 1,974 (46.0)          | 900 (48.3)            | 901 (45.1)            | 173 (40.1)            | 0.0022  |
| COPD or Asthma                                        | 1,311 (30.5)          | 592 (31.7)            | 580 (29.1)            | 139 (32.3)            | 0.3115  |
| Diabetes                                              | 1,420 (33.1)          | 610 (32.7)            | 666 (33.4)            | 144 (33.4)            | 0.6580  |
| Hyperlipidemia                                        | 1,865 (43.5)          | 822 (44.1)            | 870 (43.6)            | 173 (40.1)            | 0.2745  |
| Hypertension                                          | 3,136 (73.1)          | 1,371 (73.5)          | 1,428 (71.5)          | 337 (78.2)            | 0.7412  |
| Peripheral Vascular Disease                           | 586 (13.7)            | 285 (15.3)            | 257 (12.9)            | 44 (10.2)             | 0.0023  |
| CAD                                                   | 2,184 (50.9)          | 959 (51.4)            | 1,012 (50.7)          | 213 (49.4)            | 0.4624  |
| Prior MI                                              | 815 (19.0)            | 357 (19.1)            | 375 (18.8)            | 83 (19.3)             | 0.8863  |
| CVA/TIA                                               | 797 (18.6)            | 353 (18.9)            | 365 (18.3)            | 79 (18.3)             | 0.6198  |
| ICD only                                              | 308 (7.2)             | 129 (6.9)             | 155 (7.8)             | 24 (5.6)              | 0.9610  |
| Heart failure                                         | 2,916 (67.9)          | 1,257 (67.4)          | 1,376 (68.9)          | 283 (65.7)            | 0.8253  |
| Anemia                                                | 1,074 (25.0)          | 463 (24.8)            | 512 (25.7)            | 99 (23.0)             | 0.9091  |
| Pacemaker                                             | 682 (15.9)            | 302 (16.2)            | 320 (16.0)            | 60 (13.9)             | 0.4290  |
| Dialysis, chronic                                     | 75 (1.7)              | 46 (2.5)              | 24 (1.2)              | 5 (1.2)               | 0.0026  |
| Renal insufficiency, chronic (SCr>2.0)                | 1,209 (28.2)          | 567 (30.4)            | 562 (28.2)            | 80 (18.6)             | <.0001  |
| Depression                                            | 545 (12.7)            | 224 (12.0)            | 271 (13.6)            | 50 (11.6)             | 0.4364  |
| Valvular Heart Disease                                | 1,042 (24.3)          | 433 (23.2)            | 514 (25.8)            | 95 (22.0)             | 0.3996  |
| CRT-P (cardiac resynchronization therapy-pacing only) | 41 (1.0)              | 15 (0.8)              | 21 (1.1)              | 5 (1.2)               | 0.3618  |
| CRT-D (cardiac resynchronization therapy with ICD)    | 156 (3.6)             | 62 (3.3)              | 80 (4.0)              | 14 (3.2)              | 0.5051  |
| Ischemic Etiology                                     | 2,450 (57.1)          | 1,070 (57.4)          | 1,145 (57.4)          | 235 (54.5)            | 0.5119  |

| Variable                                               | Overall<br>N=4,588    | ≤7d<br>N=1,991        | ≤1y<br>N=2,141        | >1y<br>N=456          | P Value |
|--------------------------------------------------------|-----------------------|-----------------------|-----------------------|-----------------------|---------|
| Medical History Panel Missing                          | 296 (6.5)             | 126 (6.3)             | 145 (6.8)             | 25 (5.5)              | 0.9730  |
| Smoking                                                | 230 (5.4)             | 94 (5.1)              | 111 (5.6)             | 25 (5.9)              | 0.3783  |
| <b>Meds Prior to Admission</b>                         |                       |                       |                       |                       |         |
| ACEi/ARB [D]                                           | 927 (36.5)            | 358 (33.2)            | 456 (38.3)            | 113 (42.0)            | 0.0013  |
| Aldosterone antagonist                                 | 244 (9.6)             | 111 (10.3)            | 112 (9.4)             | 21 (7.8)              | 0.2312  |
| Anticoagulation therapy                                | 621 (24.5)            | 276 (25.6)            | 289 (24.3)            | 56 (20.8)             | 0.1482  |
| Aspirin                                                | 1,175 (46.3)          | 503 (46.6)            | 545 (45.8)            | 127 (47.2)            | 0.8982  |
| Beta-Blocker                                           | 1,360 (53.6)          | 572 (53.0)            | 646 (54.3)            | 142 (52.8)            | 0.7434  |
| Diabetic Medications (Any) [D]                         | 461 (21.4)            | 208 (22.5)            | 209 (20.6)            | 44 (20.0)             | 0.2715  |
| Hydralazine                                            | 140 (5.5)             | 54 (5.0)              | 66 (5.5)              | 20 (7.4)              | 0.1886  |
| Lipid lowering agent (Any)                             | 1,121 (44.2)          | 470 (43.6)            | 527 (44.3)            | 124 (46.1)            | 0.4978  |
| Total of prior medications<br>(max=8)*                 | 2 (1 - 3)             | 2 (1 - 3)             | 2 (1 - 3)             | 2 (1 - 3)             | 0.4247  |
| Total of prior medications (max=8)                     |                       |                       |                       |                       | 0.6375  |
| 7                                                      | 2 (0.1)               | 1 (0.1)               | 0 (0.0)               | 1 (0.4)               |         |
| 6                                                      | 33 (1.3)              | 16 (1.5)              | 13 (1.1)              | 4 (1.5)               |         |
| 5                                                      | 140 (5.5)             | 53 (4.8)              | 68 (5.7)              | 19 (7.0)              |         |
| 4                                                      | 396 (15.5)            | 164 (15.0)            | 202 (16.8)            | 30 (11.1)             |         |
| 3                                                      | 600 (23.4)            | 264 (24.2)            | 263 (21.9)            | 73 (27.0)             |         |
| 2                                                      | 608 (23.7)            | 247 (22.6)            | 294 (24.5)            | 67 (24.8)             |         |
| 1                                                      | 537 (21.0)            | 242 (22.1)            | 247 (20.6)            | 48 (17.8)             |         |
| 0                                                      | 247 (9.6)             | 106 (9.7)             | 113 (9.4)             | 28 (10.4)             |         |
| Ace inhibitor                                          | 676 (26.6)            | 267 (24.7)            | 331 (27.8)            | 78 (29.0)             | 0.0601  |
| Angiotensin receptor blocker                           | 260 (10.2)            | 96 (8.9)              | 129 (10.8)            | 35 (13.0)             | 0.0305  |
| Antiarrhythmic                                         | 239 (9.4)             | 98 (9.1)              | 116 (9.7)             | 25 (9.3)              | 0.6930  |
| Antiplatelet agent (excluding aspirin)                 | 369 (14.5)            | 167 (15.5)            | 159 (13.4)            | 43 (16.0)             | 0.4627  |
| Ca channel blocker                                     | 542 (21.4)            | 248 (23.0)            | 242 (20.3)            | 52 (19.3)             | 0.0807  |
| Digoxin                                                | 397 (15.6)            | 166 (15.4)            | 188 (15.8)            | 43 (16.0)             | 0.7525  |
| Nitrate                                                | 427 (16.8)            | 163 (15.1)            | 222 (18.7)            | 42 (15.6)             | 0.1356  |
| Diuretic                                               | 1,640 (64.6)          | 693 (64.2)            | 779 (65.5)            | 168 (62.5)            | 0.9727  |
| Thiazide/Thiazide-like                                 | 187 (7.4)             | 84 (7.8)              | 78 (6.6)              | 25 (9.3)              | 0.8793  |
| Loop                                                   | 1,542 (60.8)          | 647 (60.0)            | 741 (62.3)            | 154 (57.2)            | 0.8622  |
| Statin                                                 | 1,009 (39.8)          | 422 (39.1)            | 478 (40.2)            | 109 (40.5)            | 0.5653  |
| Other lipid lowering agent                             | 89 (3.5)              | 40 (3.7)              | 38 (3.2)              | 11 (4.1)              | 0.8311  |
| Omega-3 fatty acid supplement                          | 58 (2.3)              | 31 (2.9)              | 23 (1.9)              | 4 (1.5)               | 0.0793  |
| Renin Inhibitor                                        | 4 (0.2)               | 2 (0.2)               | 1 (0.1)               | 1 (0.4)               | 0.9516  |
| Other                                                  | 1,291 (50.9)          | 578 (53.6)            | 580 (48.7)            | 133 (49.4)            | 0.0318  |
| Meds Prior to Admission are Missing? [D]               | 2,050 (44.7)          | 912 (45.8)            | 951 (44.4)            | 187 (41.0)            | 0.0914  |
| <b>Vitals on Admission</b>                             |                       |                       |                       |                       |         |
| Heart Rate, bpm*                                       | 84 (71 - 100)         | 84 (71 - 100)         | 84 (71 - 99)          | 83 (71 - 98.5)        | 0.2593  |
| SBP, mmHg*                                             | 128 (110 - 148)       | 125 (108 - 144)       | 128 (111 - 149)       | 139 (118 - 160)       | <.0001  |
| DBP, mmHg*                                             | 69 (59 - 80)          | 68 (58 - 78)          | 70 (60 - 81)          | 72 (62 - 84)          | <.0001  |
| BMI*                                                   | 24.93 (21.33 - 29.53) | 24.99 (21.47 - 29.75) | 24.58 (21.11 - 28.71) | 26.01 (22.25 - 30.64) | 0.8734  |
| <b>Discharge Meds</b>                                  |                       |                       |                       |                       |         |
| ACEi/ARB [D]                                           | 518 (21.5)            | 126 (12.1)            | 284 (25.2)            | 108 (44.6)            | <.0001  |
| Aldosterone Antagonist prescribed/contraindicated [D]  | 253 (7.8)             | 63 (4.1)              | 152 (10.8)            | 38 (13.6)             | <.0001  |
| Anticoagulation Therapy prescribed/contraindicated [D] | 410 (12.7)            | 130 (8.5)             | 224 (15.8)            | 56 (20.1)             | <.0001  |
| ASA prescribed/contraindicated [D]                     | 501 (38.8)            | 142 (26.0)            | 271 (44.9)            | 88 (61.5)             | <.0001  |
| Beta Blocker prescribed/contraindicated [D]            | 1,159 (46.9)          | 346 (32.4)            | 648 (56.2)            | 165 (66.8)            | <.0001  |
| Diabetic Tx prescribed/contraindicated [D]             | 389 (21.4)            | 124 (16.3)            | 215 (24.5)            | 50 (27.5)             | <.0001  |
| Hydralazine Nitrate prescribed/contraindicated [D]     | 174 (5.5)             | 63 (4.2)              | 84 (6.1)              | 27 (9.7)              | <.0001  |
| Lipid Lowering Med(s) prescribed/contraindicated [D]   | 328 (27.1)            | 78 (15.3)             | 197 (34.6)            | 53 (40.5)             | <.0001  |
| Total of discharge medications (max=8)*                | 0 (0 - 1)             | 0 (0 - 1)             | 0 (0 - 2)             | 1 (0 - 2)             | <.0001  |
| Total of discharge medications (max=8)                 |                       |                       |                       |                       | <.0001  |
| 6                                                      | 18 (0.4)              | 2 (0.1)               | 11 (0.5)              | 5 (1.1)               |         |
| 5                                                      | 69 (1.5)              | 15 (0.8)              | 35 (1.6)              | 19 (4.2)              |         |
| 4                                                      | 170 (3.7)             | 45 (2.3)              | 94 (4.4)              | 31 (6.8)              |         |
| 3                                                      | 316 (6.9)             | 78 (3.9)              | 188 (8.8)             | 50 (11.0)             |         |
| 2                                                      | 451 (9.8)             | 139 (7.0)             | 256 (12.0)            | 56 (12.3)             |         |



| Variable                                                             | Overall<br>N=4,588 | <=7d<br>N=1,991 | <=1y<br>N=2,141  | >1y<br>N=456       | P Value |
|----------------------------------------------------------------------|--------------------|-----------------|------------------|--------------------|---------|
| 1                                                                    | 749 (16.3)         | 293 (14.7)      | 382 (17.8)       | 74 (16.2)          |         |
| 0                                                                    | 2,815 (61.4)       | 1,419 (71.3)    | 1,175 (54.9)     | 221 (48.5)         |         |
| ACEI prescribed/contraindicated [D]                                  | 373 (15.5)         | 98 (9.4)        | 208 (18.5)       | 67 (27.8)          | <.0001  |
| ARB prescribed/contraindicated [D]                                   | 149 (6.2)          | 30 (2.9)        | 77 (6.9)         | 42 (17.4)          | <.0001  |
| Clopidogrel prescribed/contraindicated [D]                           | 183 (10.0)         | 58 (6.6)        | 97 (12.2)        | 28 (17.6)          | <.0001  |
| OMEGA-3 fatty acid supplement prescribed/contraindicated [D]         | 36 (2.4)           | 10 (1.5)        | 20 (3.0)         | 6 (4.4)            | <.0001  |
| ICD Therapy prescribed/contraindicated [D]                           | 172 (5.8)          | 71 (5.1)        | 82 (6.4)         | 19 (7.4)           | 0.2041  |
| CRT-D or CRT-P prescribed/contraindicated [D]                        | 162 (6.0)          | 63 (5.1)        | 78 (6.3)         | 21 (8.2)           | 0.0305  |
| <b>Lipids</b>                                                        |                    |                 |                  |                    |         |
| Total Cholesterol, mg/dL*                                            | 122 (100 - 150)    | 120 (99 - 150)  | 121 (100 - 149)  | 136 (114 - 155)    | 0.1553  |
| HDL, mg/dL*                                                          | 37 (28 - 48)       | 37 (26 - 48)    | 36 (28 - 48.5)   | 39 (29 - 48)       | 0.2657  |
| LDL, mg/dL*                                                          | 67.5 (51 - 91)     | 64 (49 - 90)    | 67 (51 - 90)     | 79.5 (60.5 - 95)   | 0.0653  |
| Triglycerides, mg/dL*                                                | 82 (62 - 107)      | 85 (64 - 111.5) | 78 (60 - 105)    | 75.5 (62.5 - 98)   | 0.0341  |
| <b>Lab Measures</b>                                                  |                    |                 |                  |                    |         |
| Serum sodium, mEq/L*                                                 | 138 (134 - 141)    | 138 (134 - 141) | 138 (134 - 140)  | 138 (134 - 141)    | 0.5966  |
| Hemoglobin, g/dL*                                                    | 11.3 (10 - 12.7)   | 11 (9.9 - 12.5) | 11.4 (10 - 12.8) | 11.5 (10.3 - 13.1) | 0.0027  |
| Serum creatinine, mg/dL*                                             | 1.5 (1 - 2.1)      | 1.6 (1.1 - 2.2) | 1.4 (1 - 2)      | 1.3 (1 - 1.8)      | <.0001  |
| BUN, mg/dL*                                                          | 33 (22 - 51)       | 36 (25 - 55)    | 31 (22 - 49)     | 27 (19 - 42)       | <.0001  |
| HbA1C, %*                                                            | 6.5 (5.85 - 7.25)  | 6.6 (6 - 7.2)   | 6.4 (5.8 - 7.4)  | 6.6 (6 - 7)        | 0.6098  |
| <b>Symptoms</b>                                                      |                    |                 |                  |                    |         |
| Admission Chest pain                                                 | 227 (10.9)         | 77 (8.8)        | 117 (11.8)       | 33 (15.2)          | 0.0032  |
| Admission Decreased appetite/early satiety                           | 186 (8.9)          | 83 (9.5)        | 89 (9.0)         | 14 (6.5)           | 0.2714  |
| Admission Dizziness/lightheadedness/syncope                          | 125 (6.0)          | 55 (6.3)        | 55 (5.6)         | 15 (6.9)           | 0.8484  |
| Admission Dyspnea at rest                                            | 1,135 (54.6)       | 469 (53.7)      | 550 (55.6)       | 116 (53.5)         | 0.6310  |
| Admission Dyspnea on exertion                                        | 1,169 (56.2)       | 472 (54.0)      | 559 (56.5)       | 138 (63.6)         | 0.0249  |
| Admission Fatigue                                                    | 534 (25.7)         | 231 (26.4)      | 255 (25.8)       | 48 (22.1)          | 0.3174  |
| Admission Orthopnea                                                  | 411 (19.8)         | 164 (18.8)      | 209 (21.1)       | 38 (17.5)          | 0.6006  |
| Admission Palpitations                                               | 47 (2.3)           | 13 (1.5)        | 30 (3.0)         | 4 (1.8)            | 0.1187  |
| Admission PND                                                        | 164 (7.9)          | 66 (7.6)        | 79 (8.0)         | 19 (8.8)           | 0.5638  |
| Admission Symptoms are Missing? [D]                                  | 2,508 (54.7)       | 1,117 (56.1)    | 1,152 (53.8)     | 239 (52.4)         | 0.0723  |
| <b>Discharge Symptoms</b>                                            |                    |                 |                  |                    |         |
| Unable to determine                                                  | 256 (12.2)         | 94 (10.4)       | 136 (13.9)       | 26 (12.4)          | <.0001  |
| Better, asymptomatic                                                 | 277 (13.2)         | 74 (8.2)        | 150 (15.3)       | 53 (25.4)          |         |
| Better, symptomatic                                                  | 822 (39.3)         | 262 (29.0)      | 454 (46.4)       | 106 (50.7)         |         |
| Unchanged                                                            | 365 (17.4)         | 204 (22.6)      | 143 (14.6)       | 18 (8.6)           |         |
| Worse                                                                | 372 (17.8)         | 270 (29.9)      | 96 (9.8)         | 6 (2.9)            |         |
| Risk Interventions: Symptoms Worsening                               | 2,877 (78.3)       | 1,103 (71.1)    | 1,435 (82.5)     | 339 (88.3)         | <.0001  |
| <b>Parental Therapy</b>                                              |                    |                 |                  |                    |         |
| None                                                                 | 651 (20.9)         | 296 (22.3)      | 283 (19.4)       | 72 (22.4)          | 0.2491  |
| Dopamine                                                             | 133 (4.3)          | 79 (5.9)        | 47 (3.2)         | 7 (2.2)            | <.0001  |
| Milrinone                                                            | 67 (2.2)           | 31 (2.3)        | 29 (2.0)         | 7 (2.2)            | 0.6159  |
| Nesiritide                                                           | 47 (1.5)           | 26 (2.0)        | 17 (1.2)         | 4 (1.2)            | 0.1011  |
| Nitroglycerine                                                       | 112 (3.6)          | 53 (4.0)        | 44 (3.0)         | 15 (4.7)           | 0.6172  |
| Vasopressin antagonist                                               | 21 (0.7)           | 8 (0.6)         | 12 (0.8)         | 1 (0.3)            | 0.9366  |
| Dobutamine                                                           | 186 (6.0)          | 88 (6.6)        | 87 (6.0)         | 11 (3.4)           | 0.0711  |
| Loop diuretics                                                       | 2,300 (73.9)       | 949 (71.5)      | 1,115 (76.3)     | 236 (73.3)         | 0.0286  |
| Intermittent bolus                                                   | 2,073 (66.6)       | 851 (64.1)      | 1,006 (68.8)     | 216 (67.1)         | 0.0240  |
| Continuous infusion                                                  | 208 (6.7)          | 99 (7.5)        | 96 (6.6)         | 13 (4.0)           | 0.0532  |
| Other IV vasodilator                                                 | 58 (1.9)           | 30 (2.3)        | 22 (1.5)         | 6 (1.9)            | 0.2321  |
| Parenteral Therapy Missing [D]                                       | 1,476 (32.2)       | 663 (33.3)      | 679 (31.7)       | 134 (29.4)         | 0.0964  |
| <b>Advanced Care</b>                                                 |                    |                 |                  |                    |         |
| Advanced Care Plan/Surrogate Decision Maker Documented Or Discussed? | 1,657 (75.6)       | 702 (73.8)      | 794 (77.8)       | 161 (72.5)         | 0.2920  |
| Advance Directive Executed                                           | 106 (71.1)         | 56 (75.7)       | 40 (67.8)        | 10 (62.5)          | 0.2017  |
| HF Reporting: Advanced Care Plan In-hospital Procedure               | 2,373 (51.7)       | 1,034 (52.0)    | 1,099 (51.3)     | 240 (52.6)         | 0.9214  |
| No Procedures                                                        | 2,560 (88.6)       | 1,063 (85.6)    | 1,229 (90.8)     | 268 (90.8)         | <.0001  |
| Cardiac Cath/Coronary                                                | 75 (2.6)           | 30 (2.4)        | 33 (2.4)         | 12 (4.1)           | 0.3151  |

| Variable                                              | Overall<br>N=4,588 | <=7d<br>N=1,991 | <=1y<br>N=2,141 | >1y<br>N=456    | P Value |
|-------------------------------------------------------|--------------------|-----------------|-----------------|-----------------|---------|
| angiography                                           |                    |                 |                 |                 |         |
| PCI with stent                                        | 5 (0.2)            | 2 (0.2)         | 2 (0.1)         | 1 (0.3)         | 0.7233  |
| Coronary artery bypass graft                          | 3 (0.1)            | 2 (0.2)         | 1 (0.1)         | 0 (0.0)         | 0.3683  |
| Cardiac Valve Surgery                                 | 4 (0.1)            | 4 (0.3)         | 0 (0.0)         | 0 (0.0)         | 0.0288  |
| Right Cardiac Catheterization                         | 36 (1.2)           | 11 (0.9)        | 21 (1.6)        | 4 (1.4)         | 0.1771  |
| Pacemaker                                             | 11 (0.4)           | 7 (0.6)         | 4 (0.3)         | 0 (0.0)         | 0.1207  |
| CRT-D (cardiac resynchronization therapy with ICD)    | 12 (0.4)           | 6 (0.5)         | 6 (0.4)         | 0 (0.0)         | 0.4199  |
| ICD only                                              | 7 (0.2)            | 4 (0.3)         | 3 (0.2)         | 0 (0.0)         | 0.3467  |
| Cardioversion                                         | 15 (0.5)           | 5 (0.4)         | 10 (0.7)        | 0 (0.0)         | 0.8328  |
| Dialysis or Ultrafiltration unspecified               | 23 (0.8)           | 14 (1.1)        | 8 (0.6)         | 1 (0.3)         | 0.0734  |
| Left Ventricular assist device                        | 1 (0.0)            | 1 (0.1)         | 0 (0.0)         | 0 (0.0)         | 0.2745  |
| Mechanical ventilation                                | 102 (3.5)          | 66 (5.3)        | 27 (2.0)        | 9 (3.1)         | <.0001  |
| Transplant (Heart)                                    | 1 (0.0)            | 0 (0.0)         | 1 (0.1)         | 0 (0.0)         | 0.5300  |
| Stress Testing                                        | 37 (1.3)           | 19 (1.5)        | 13 (1.0)        | 5 (1.7)         | 0.5086  |
| Dialysis                                              | 54 (1.9)           | 37 (3.0)        | 16 (1.2)        | 1 (0.3)         | <.0001  |
| Ultrafiltration                                       | 10 (0.3)           | 5 (0.4)         | 5 (0.4)         | 0 (0.0)         | 0.4617  |
| CRT-P (cardiac resynchronization therapy-pacing only) | 3 (0.1)            | 1 (0.1)         | 1 (0.1)         | 1 (0.3)         | 0.4683  |
| Atrial Fibrillation Ablation or Surgery               | 1 (0.0)            | 1 (0.1)         | 0 (0.0)         | 0 (0.0)         | 0.2745  |
| Procedures are Missing? [D]                           | 1,698 (37.0)       | 749 (37.6)      | 788 (36.8)      | 161 (35.3)      | 0.3688  |
| <b>Hospital Characteristics</b>                       |                    |                 |                 |                 |         |
| Number of Beds*                                       | 368 (221 - 508)    | 368 (221 - 524) | 367 (221 - 501) | 364 (216 - 508) | 0.1429  |
| Geographic Region                                     |                    |                 |                 |                 | 0.0518  |
| West                                                  | 578 (12.6)         | 226 (11.4)      | 284 (13.3)      | 68 (14.9)       |         |
| South                                                 | 1,692 (36.9)       | 726 (36.5)      | 795 (37.1)      | 171 (37.5)      |         |
| Midwest                                               | 1,210 (26.4)       | 542 (27.2)      | 566 (26.4)      | 102 (22.4)      |         |
| Northeast                                             | 1,108 (24.1)       | 497 (25.0)      | 496 (23.2)      | 115 (25.2)      |         |
| Rural Location                                        | 215 (4.8)          | 74 (3.8)        | 110 (5.3)       | 31 (6.9)        | 0.0030  |
| Teaching Status                                       | 3,117 (69.3)       | 1,380 (70.8)    | 1,426 (67.9)    | 311 (69.6)      | 0.1199  |
| Heart Transplant Hospital                             | 325 (9.8)          | 157 (11.1)      | 140 (9.0)       | 28 (8.3)        | 0.0292  |

**eTable 9.** Left ventricular assist device implantation or heart transplantation at 1 year after index heart failure discharge

| <i>Procedures at One Year</i> | <i>Groups</i> | <i>Cumulative Incidence</i> | <i>Gray's P</i> |
|-------------------------------|---------------|-----------------------------|-----------------|
| LVAD                          | Hospice       | 1 (0.02)                    | <.0001          |
|                               | Advanced HF   | 44 (1.02)                   |                 |
|                               | Other HF      | 106 (0.10)                  |                 |
| Heart Transplant              | Hospice       | 0 (0.00)                    | <.0001          |
|                               | Advanced HF   | 24 (0.56)                   |                 |
|                               | Other HF      | 32 (0.03)                   |                 |
| LVAD or Heart Transplant      | Hospice       | 1 (0.02)                    | <.0001          |
|                               | Advanced HF   | 67 (1.56)                   |                 |
|                               | Other HF      | 132 (0.12)                  |                 |

**eTable 10.** Mortality, readmission, and composite outcomes in heart failure patients discharged to hospice by hospice destination

| Outcomes                               | Cumulative Incidence | Unadjusted Analysis |         | Adjusted Analysis |         |
|----------------------------------------|----------------------|---------------------|---------|-------------------|---------|
|                                        | N (%), P Value*      | HR (95% CI)         | P Value | HR (95% CI)       | P Value |
| <b>30 Day</b>                          |                      |                     |         |                   |         |
| All- cause Mortality                   | <.0001               |                     |         |                   |         |
| Home                                   | 1,281 (52.85)        | 0.44 (0.40, 0.47)   | <.0001  | 0.44 (0.40, 0.48) | <.0001  |
| Health Care Facility                   | 1,745 (80.64)        | Reference           |         | Reference         |         |
| All- cause Readmission                 | <.0001               |                     |         |                   |         |
| Home                                   | 136 (5.61)           | 2.29 (1.65, 3.19)   | <.0001  | 2.06 (1.46, 2.90) | <.0001  |
| Health Care Facility                   | 53 (2.45)            | Reference           |         | Reference         |         |
| Composite of Mortality and Readmission | <.0001               |                     |         |                   |         |
| Home                                   | 1,372 (56.62)        | 0.46 (0.43, 0.50)   | <.0001  | 0.46 (0.42, 0.50) | <.0001  |
| Health Care Facility                   | 1,771 (81.90)        | Reference           |         | Reference         |         |
| <b>6 Months</b>                        |                      |                     |         |                   |         |
| All- cause Mortality                   | <.0001               |                     |         |                   |         |
| Home                                   | 1,911 (78.84)        | 0.51 (0.47, 0.54)   | <.0001  | 0.51 (0.48, 0.55) | <.0001  |
| Health Care Facility                   | 1,990 (91.96)        | Reference           |         | Reference         |         |
| All- cause Readmission                 | <.0001               |                     |         |                   |         |
| Home                                   | 294 (12.17)          | 2.53 (1.99, 3.22)   | <.0001  | 2.33 (1.81, 3.00) | <.0001  |
| Health Care Facility                   | 107 (4.96)           | Reference           |         | Reference         |         |
| Composite of Mortality and Readmission | <.0001               |                     |         |                   |         |
| Home                                   | 2,034 (84.07)        | 0.53 (0.50, 0.57)   | <.0001  | 0.53 (0.49, 0.57) | <.0001  |
| Health Care Facility                   | 2,028 (93.84)        | Reference           |         | Reference         |         |
| <b>One Year</b>                        |                      |                     |         |                   |         |
| All- cause Mortality                   | <.0001               |                     |         |                   |         |
| Home                                   | 2,079 (85.77)        | 0.52 (0.49, 0.56)   | <.0001  | 0.52 (0.49, 0.56) | <.0001  |
| Health Care Facility                   | 2,053 (94.87)        | Reference           |         | Reference         |         |
| All- cause Readmission                 | <.0001               |                     |         |                   |         |
| Home                                   | 368 (15.28)          | 2.66 (2.17, 3.26)   | <.0001  | 2.45 (1.98, 3.04) | <.0001  |
| Health Care Facility                   | 129 (6.00)           | Reference           |         | Reference         |         |
| Composite of Mortality and Readmission | <.0001               |                     |         |                   |         |
| Home                                   | 2,202 (91.12)        | 0.54 (0.51, 0.58)   | <.0001  | 0.54 (0.51, 0.58) | <.0001  |
| Health Care Facility                   | 2,089 (96.70)        | Reference           |         | Reference         |         |

\* Under "Cumulative Incidences," log-rank P is shown for mortality and Gray's P is shown for other outcomes.

**eTable 11.** Hospital course of patients' first readmission within 1 year post index heart failure discharge

| Variables                               | Hospice<br>N=497 | Advanced HF<br>N=2,948 | Other HF<br>N=73,804 | P-value | Std.<br>Hospice vs<br>Advanced HF | Diff, %<br>Hospice vs<br>Other HF |
|-----------------------------------------|------------------|------------------------|----------------------|---------|-----------------------------------|-----------------------------------|
| Age*                                    | 84 (76 - 89)     | 78 (71 - 83.5)         | 81 (74 - 87)         | <.0001  | 59.71                             | 27.42                             |
| Female                                  | 276 (55.5)       | 978 (33.2)             | 41,022 (55.6)        | <.0001  | 46.19                             | 0.10                              |
| Race                                    |                  |                        |                      | 0.0092  |                                   |                                   |
| White                                   | 394 (80.7)       | 2,288 (78.8)           | 58,581 (81.0)        |         | 4.92                              | 0.67                              |
| Black                                   | 60 (12.3)        | 351 (12.1)             | 7,484 (10.3)         |         | 0.65                              | 6.15                              |
| Hispanic (any race)                     | 18 (3.7)         | 138 (4.8)              | 3,395 (4.7)          |         | 5.28                              | 5.02                              |
| Asian                                   | 10 (2.0)         | 40 (1.4)               | 906 (1.3)            |         | 5.18                              | 6.25                              |
| Other (includes UTD)                    | 6 (1.2)          | 88 (3.0)               | 1,954 (2.7)          |         | 12.49                             | 10.62                             |
| LOS, day*                               | 4 (2 - 7)        | 4 (3 - 8)              | 4 (3 - 7)            | <.0001  | 6.09                              | 1.87                              |
| Discharge Disposition                   |                  |                        |                      | <.0001  |                                   |                                   |
| Left Against Medical Advice/AMA         | 2 (0.4)          | 16 (0.5)               | 210 (0.3)            |         | 2.02                              | 2.04                              |
| Expired                                 | 59 (12.1)        | 266 (9.1)              | 4,428 (6.1)          |         | 9.61                              | 20.94                             |
| Other Health Care Facility              | 119 (24.4)       | 649 (22.3)             | 21,119 (29.1)        |         | 4.96                              | 10.67                             |
| Acute Care Facility                     | 9 (1.8)          | 74 (2.5)               | 1,239 (1.7)          |         | 4.76                              | 1.04                              |
| Hospice - Health Care Facility          | 44 (9.0)         | 81 (2.8)               | 1,440 (2.0)          |         | 26.70                             | 31.22                             |
| Hospice - Home                          | 87 (17.8)        | 99 (3.4)               | 1,372 (1.9)          |         | 48.18                             | 55.48                             |
| Home                                    | 168 (34.4)       | 1,727 (59.3)           | 42,759 (58.9)        |         | 51.48                             | 50.65                             |
| Primary diagnosis: CV                   | 216 (43.5)       | 1,693 (57.4)           | 35,702 (48.4)        | <.0001  | 28.21                             | 9.87                              |
| Primary diagnosis: HF                   | 141 (28.4)       | 1,246 (42.3)           | 21,837 (29.6)        | <.0001  | 29.39                             | 2.68                              |
| <i>First Readmitted before Oct 2015</i> | N=495            | N=2,947                | N=73,687             |         |                                   |                                   |
| Procedures: Cardiac                     | 67 (13.5)        | 767 (26.0)             | 16,637 (22.6)        | <.0001  | 31.75                             | 23.67                             |
| Procedures: Respiratory                 | 23 (4.6)         | 155 (5.3)              | 3,850 (5.2)          | 0.8433  | 2.83                              | 2.67                              |

**eTable 12.** Hospital course of patients' first readmission within 1 year post discharge by hospice destination at index heart failure discharge

| Variable                                | Home<br>N=368 | Health Care Facilities<br>N=129 | P-value | Standardized<br>Differences, % |
|-----------------------------------------|---------------|---------------------------------|---------|--------------------------------|
| Age*                                    | 83 (75 - 88)  | 86 (80 - 91)                    | 0.0002  | 37.55                          |
| Female                                  | 204 (55.4)    | 72 (55.8)                       | 0.9406  | 0.76                           |
| Race                                    |               |                                 | 0.0905  |                                |
| White                                   | 281 (78.1)    | 113 (88.3)                      |         | 27.59                          |
| Black                                   | 52 (14.4)     | 8 (6.2)                         |         | 27.15                          |
| Hispanic (any race)                     | 14 (3.9)      | 4 (3.1)                         |         | 4.15                           |
| Asian                                   | 9 (2.5)       | 1 (0.8)                         |         | 13.56                          |
| Other (includes UTD)                    | 4 (1.1)       | 2 (1.6)                         |         | 3.93                           |
| LOS, day*                               | 4 (2 - 7)     | 4 (2 - 6)                       | 0.5054  | 10.12                          |
| Discharge Disposition                   |               |                                 | <.0001  |                                |
| Left Against Medical Advice/AMA         | 2 (0.6)       | 0 (0.0)                         |         | -                              |
| Expired                                 | 43 (11.9)     | 16 (12.5)                       |         | 1.70                           |
| Other Health Care Facility              | 65 (18.1)     | 54 (42.2)                       |         | 54.52                          |
| Acute Care Facility                     | 9 (2.5)       | 0 (0.0)                         |         | -                              |
| Hospice - Health Care Facility          | 21 (5.8)      | 23 (18.0)                       |         | 38.15                          |
| Hospice - Home                          | 74 (20.6)     | 13 (10.2)                       |         | 29.15                          |
| Home                                    | 146 (40.6)    | 22 (17.2)                       |         | 53.37                          |
| Primary diagnosis: CV                   | 168 (45.7)    | 48 (37.2)                       | 0.0963  | 17.20                          |
| Primary diagnosis: HF                   | 109 (29.6)    | 32 (24.8)                       | 0.2972  | 10.83                          |
| <i>First Readmitted before Oct 2015</i> | N=367         | N=128                           |         |                                |
| Procedures: Cardiac                     | 53 (14.4)     | 14 (10.9)                       | 0.3189  | 10.54                          |
| Procedures: Respiratory                 | 19 (5.2)      | 4 (3.1)                         | 0.3427  | 10.30                          |

**eTable 13.** One-year cumulative incidence rate for readmission from hospice by year (4588 patients from 337 sites)

| Year  | Hospice<br>N Events (%) | Hospice Destination  |                                         |
|-------|-------------------------|----------------------|-----------------------------------------|
|       |                         | Home<br>N Events (%) | Health Care<br>Facility<br>N Events (%) |
| 2005  | 6 (5.50)                | 3 (6.00)             | 3 (5.08)                                |
| 2006  | 28 (15.58)              | 24 (22.59)           | 4 (5.41)                                |
| 2007  | 22 (11.76)              | 15 (13.64)           | 7 (9.09)                                |
| 2008  | 25 (11.42)              | 19 (15.26)           | 6 (6.32)                                |
| 2009  | 24 (8.25)               | 19 (11.58)           | 5 (4.05)                                |
| 2010  | 51 (12.42)              | 39 (17.65)           | 12 (6.39)                               |
| 2011  | 66 (11.55)              | 46 (15.39)           | 20 (7.33)                               |
| 2012  | 81 (11.64)              | 59 (16.40)           | 22 (6.54)                               |
| 2013  | 111 (11.90)             | 86 (17.67)           | 25 (5.59)                               |
| 2014  | 83 (8.65)               | 58 (11.93)           | 25 (5.28)                               |
| Total | 497 (10.90)             | 368 (15.28)          | 129 (6.00)                              |

**eTable 14.** Factors associated with 1-year all-cause readmissions in heart failure patients readmitted from hospice

| Variables                          | Adjusted HR ( 95 % CI) | P Value  |
|------------------------------------|------------------------|----------|
| Demographic                        |                        |          |
| Age, per 5 years                   | 0.85 (0.79, 0.91)      | <.0001 * |
| Sex                                |                        |          |
| Female                             | 1.02 (0.82, 1.27)      | 0.8538   |
| Male                               | Reference              |          |
| Race                               |                        |          |
| White                              | 0.63 (0.46, 0.85)      | 0.0026 * |
| Other                              | Reference              |          |
| Median household income, per \$10k | 1.02 (0.90, 1.17)      | 0.7289   |
| Median home value, per \$10k       | 1.01 (0.99, 1.02)      | 0.4215   |
| % High school degree, per 10%      | 1.00 (0.78, 1.28)      | 0.9775   |
| % College degree, per 10%          | 0.92 (0.76, 1.13)      | 0.4395   |
| Discharge Year, per year           | 1.00 (0.99, 1.01)      | 0.4525   |
| EF groups                          |                        |          |
| HFrEF, Reduced                     | 1.13 (0.90, 1.41)      | 0.3052   |
| HFpEF, Borderline                  | 1.09 (0.79, 1.51)      | 0.5958   |
| HFpEF, Preserved                   | Reference              |          |
| Medical History                    |                        |          |
| Anemia                             | 0.93 (0.73, 1.16)      | 0.5077   |
| Sschemic etiology                  | 1.05 (0.86, 1.27)      | 0.6374   |
| CVA/TIA                            | 0.81 (0.63, 1.05)      | 0.1164   |
| Diabetes                           | 0.85 (0.70, 1.03)      | 0.0993   |
| Hyperlipidemia                     | 1.01 (0.81, 1.27)      | 0.9214   |
| Hypertension                       | 1.18 (0.95, 1.47)      | 0.1401   |
| COPD or Asthma                     | 1.20 (0.97, 1.49)      | 0.0950   |
| PVD                                | 0.98 (0.71, 1.33)      | 0.8788   |
| Renal insufficiency                | 0.92 (0.71, 1.19)      | 0.5221   |
| Smoking                            | 1.06 (0.74, 1.52)      | 0.7537   |
| Measures, per 5 units              |                        |          |
| Heart Rate, bpm                    | 0.97 (0.95, 1.00)      | 0.0260 * |
| SBP, mmHg                          | 1.03 (1.02, 1.05)      | 0.0002 * |
| BMI                                | 1.04 (0.95, 1.13)      | 0.3783   |
| Serum sodium, mEq/L                | 0.94 (0.85, 1.04)      | 0.2373   |
| Serum creatinine, mg/dL            | 0.97 (0.80, 1.16)      | 0.7207   |
| BUN, mg/dL                         | 0.97 (0.94, 1.00)      | 0.0392 * |
| Hospital Characteristics           |                        |          |
| Bed size, per 100 units            | 1.05 (0.98, 1.12)      | 0.1398   |
| Geographic Region                  |                        |          |
| Midwest                            | 0.89 (0.65, 1.23)      | 0.4924   |
| South                              | 1.10 (0.81, 1.49)      | 0.5411   |
| West                               | 1.04 (0.74, 1.45)      | 0.8369   |
| Northeast                          | Reference              |          |
| Rural Location                     | 0.85 (0.48, 1.48)      | 0.5611   |
| Teaching Status                    | 0.99 (0.74, 1.32)      | 0.9490   |

\* P-values smaller than 0.05;

† Df =2 p-value for LVEF groups;

‡ Df =3 p-value for site region.

Note:

We tested an indicator variable on age older than 80y and its interaction with age continuous variable. Neither the interaction term nor the indicator alone were found significant in model, and hence were not included.
